# Supplementary material
Source: MDPI journal article supplement (https://www.mdpi.com/2413-8851/5/2/44)
Supplement: s1 [file s1]

## Supplementary 1 -Sample Questionnaire

|     |                                                                                                                                                                                                               | not at all *             | a bit *                  | a lot *                  |
|-----|---------------------------------------------------------------------------------------------------------------------------------------------------------------------------------------------------------------|--------------------------|--------------------------|--------------------------|
| 1   | How much do you like your neighbourhood?<br>आप अपने गली- मुहल्ले को कितना पसंद करते है?                                                                                                                       | <input type="checkbox"/> | <input type="checkbox"/> | <input type="checkbox"/> |
| 2   | How would you rate the following in your neighbourhood?<br>आप अपने गली-मुहल्ले में इन चीजों को कैसे रेट करेंगे? संतुष्ट                                                                                       | bad *                    | okay *                   | good *                   |
|     | Access to basic amenities like household level tap water, electricity, toilet/sewerage<br>घर में नलके का पानी, बिजली, लेट्रिन/ गंदे पानी की नाली ,                                                            | <input type="checkbox"/> | <input type="checkbox"/> | <input type="checkbox"/> |
|     | Quality of housing structure घर की बनावट की हालत                                                                                                                                                              | <input type="checkbox"/> | <input type="checkbox"/> | <input type="checkbox"/> |
|     | Proximity to public transport like bus stop, बस स्टॉप से नज़दीकी                                                                                                                                              | <input type="checkbox"/> | <input type="checkbox"/> | <input type="checkbox"/> |
|     | Proximity to greenery like public parks, gardens पार्क, बगीचे से नज़दीकी                                                                                                                                      | <input type="checkbox"/> | <input type="checkbox"/> | <input type="checkbox"/> |
|     | Access to community spaces where you can gather with your neighbours and friends/relatives<br>मुहल्ले में ऐसी सामुदायिक जगहों तक पहुँच जहाँ आप अपने पड़ोसियों, रिश्तेदारों और दोस्तों से बात और मुलाकात करें? | <input type="checkbox"/> | <input type="checkbox"/> | <input type="checkbox"/> |
|     | Cleanliness of streets/neighbourhood (मुहल्ले की साफ़-सफाई)                                                                                                                                                   | <input type="checkbox"/> | <input type="checkbox"/> | <input type="checkbox"/> |
| * * | Regular Waste Collection                                                                                                                                                                                      | <input type="checkbox"/> | <input type="checkbox"/> | <input type="checkbox"/> |
|     | A feeling of belonging to the neighbourhood (मुहल्ले अपनेपन की भावना)                                                                                                                                         | <input type="checkbox"/> | <input type="checkbox"/> | <input type="checkbox"/> |
|     | A good relationship with neighbours and community (पड़ोसियों और समाज के लोगों से अच्छे सम्बन्ध )                                                                                                              | <input type="checkbox"/> | <input type="checkbox"/> | <input type="checkbox"/> |
|     | Proximity to employment opportunities (रोज़गार/नौकरी के अवसरों से नज़दीकी)                                                                                                                                    | <input type="checkbox"/> | <input type="checkbox"/> | <input type="checkbox"/> |
|     | Proximity to primary & secondary schools प्राथमिक और माध्यमिक स्कूलों से नज़दीकी और पहुँच                                                                                                                     | <input type="checkbox"/> | <input type="checkbox"/> | <input type="checkbox"/> |
|     | Proximity to healthcare facilities अस्पताल से नज़दीकी और पहुँच                                                                                                                                                | <input type="checkbox"/> | <input type="checkbox"/> | <input type="checkbox"/> |
|     | Sense of safety and security सुरक्षा और सलामती की भावना                                                                                                                                                       | <input type="checkbox"/> | <input type="checkbox"/> | <input type="checkbox"/> |
|     | Security of tenure घर/मकान में रहने की सुरक्षा( निकाले जाने के डर से)                                                                                                                                         | <input type="checkbox"/> | <input type="checkbox"/> | <input type="checkbox"/> |
|     | Safety from natural and manmade hazards प्राकृतिक आपदा flood                                                                                                                                                  | <input type="checkbox"/> | <input type="checkbox"/> | <input type="checkbox"/> |

  

|  |                                                                                               | thoda                    | lagbhag                  | bahut jyada              | * * *                    |
|--|-----------------------------------------------------------------------------------------------|--------------------------|--------------------------|--------------------------|--------------------------|
|  | Of the following, what do you think improves में सुधार                                        |                          |                          |                          |                          |
|  | Proximity to greenery like public parks, gardens पार्क, बगीचे से नज़दीकी                      | very little (+)          | a bit (++)               | a lot (+++)              | bikul na                 |
|  | does improving this____ affects                                                               |                          |                          |                          |                          |
|  | 1. Proximity to public transport like bus stop                                                | <input type="checkbox"/> | <input type="checkbox"/> | <input type="checkbox"/> | <input type="checkbox"/> |
|  | 2. Proximity to greenery like public parks, gardens                                           | <input type="checkbox"/> | <input type="checkbox"/> | <input type="checkbox"/> | <input type="checkbox"/> |
|  | 3. Access to community spaces where you can gather with your neighbours and friends/relatives | <input type="checkbox"/> | <input type="checkbox"/> | <input type="checkbox"/> | <input type="checkbox"/> |
|  | 4. Cleanliness of streets                                                                     | <input type="checkbox"/> | <input type="checkbox"/> | <input type="checkbox"/> | <input type="checkbox"/> |
|  | 5. Regular Waste Collection * *                                                               |                          |                          |                          |                          |
|  | 6. A feeling of belonging to the neighbourhood                                                | <input type="checkbox"/> | <input type="checkbox"/> | <input type="checkbox"/> | <input type="checkbox"/> |
|  | 7. A good relationship with neighbours and community                                          | <input type="checkbox"/> | <input type="checkbox"/> | <input type="checkbox"/> | <input type="checkbox"/> |
|  | 8. Proximity to employment opportunities                                                      | <input type="checkbox"/> | <input type="checkbox"/> | <input type="checkbox"/> | <input type="checkbox"/> |
|  | 9. Proximity to primary & secondary schools                                                   | <input type="checkbox"/> | <input type="checkbox"/> | <input type="checkbox"/> | <input type="checkbox"/> |
|  | 10. Proximity to healthcare facilities                                                        | <input type="checkbox"/> | <input type="checkbox"/> | <input type="checkbox"/> | <input type="checkbox"/> |
|  | 11. Sense of safety and security                                                              | <input type="checkbox"/> | <input type="checkbox"/> | <input type="checkbox"/> | <input type="checkbox"/> |

  

|  |                                                                                               | thoda                    | lagbhag                  | bahut jyada              | bikul na                 |
|--|-----------------------------------------------------------------------------------------------|--------------------------|--------------------------|--------------------------|--------------------------|
|  | Of the following, what do you think improves में सुधार                                        |                          |                          |                          |                          |
|  | Proximity to greenery like public parks, gardens पार्क, बगीचे से नज़दीकी                      | very little (+)          | a bit (++)               | a lot (+++)              | bikul na                 |
|  | does improving this____ affects                                                               |                          |                          |                          |                          |
|  | 1. Proximity to public transport like bus stop                                                | <input type="checkbox"/> | <input type="checkbox"/> | <input type="checkbox"/> | <input type="checkbox"/> |
|  | 2. Proximity to greenery like public parks, gardens                                           | <input type="checkbox"/> | <input type="checkbox"/> | <input type="checkbox"/> | <input type="checkbox"/> |
|  | 3. Access to community spaces where you can gather with your neighbours and friends/relatives | <input type="checkbox"/> | <input type="checkbox"/> | <input type="checkbox"/> | <input type="checkbox"/> |
|  | 4. Cleanliness of streets                                                                     | <input type="checkbox"/> | <input type="checkbox"/> | <input type="checkbox"/> | <input type="checkbox"/> |
|  | 5. Regular Waste Collection                                                                   |                          |                          |                          |                          |
|  | 6. A feeling of belonging to the neighbourhood                                                | <input type="checkbox"/> | <input type="checkbox"/> | <input type="checkbox"/> | <input type="checkbox"/> |
|  | 7. A good relationship with neighbours and community                                          | <input type="checkbox"/> | <input type="checkbox"/> | <input type="checkbox"/> | <input type="checkbox"/> |
|  | 8. Proximity to employment opportunities                                                      | <input type="checkbox"/> | <input type="checkbox"/> | <input type="checkbox"/> | <input type="checkbox"/> |
|  | 9. Proximity to primary & secondary schools                                                   | <input type="checkbox"/> | <input type="checkbox"/> | <input type="checkbox"/> | <input type="checkbox"/> |
|  | 10. Proximity to healthcare facilities                                                        | <input type="checkbox"/> | <input type="checkbox"/> | <input type="checkbox"/> | <input type="checkbox"/> |
|  | 11. Sense of safety and security                                                              | <input type="checkbox"/> | <input type="checkbox"/> | <input type="checkbox"/> | <input type="checkbox"/> |

\* "a lot"/"good" = Satisfied, "a bit"/"okay" = Can be improved, "not at all"/"bad" = Dissatisfied

\* \* Questions about "cleanliness of streets" and "regular waste collection" was dropped after the first 3 interviews since the respondents found it repetitive. They were replaced by only one question, "Cleanliness of streets/neighbourhood".

\* \* \* "bikul nahi" = No influence

## Supplementary 2-Ratings from Interviewee 1 Neighbourhood 1

|                                                                                                                                                                                                              | not at all                                                  | a bit                                          | a lot                                           |
|--------------------------------------------------------------------------------------------------------------------------------------------------------------------------------------------------------------|-------------------------------------------------------------|------------------------------------------------|-------------------------------------------------|
| 1 How much do you like your neighbourhood?<br>आप अपने गली-महल्ले को कितना पसंद करते हैं?                                                                                                                     | <input checked="" type="checkbox"/><br>बिल्कुल नहीं,<br>bad | <input type="checkbox"/><br>, थोड़ा सा<br>okay | <input type="checkbox"/><br>बहुत ज्यादा<br>good |
| 2 How would you rate the following in your neighbourhood?<br>आप अपने गली-महल्ले में इन चीजों को कैसे रेट करेंगे? संतुष्ट                                                                                     |                                                             |                                                |                                                 |
| Access to basic amenities like household level tap water, electricity, toilet/sewerage<br>घर में नलके का पानी, बिजली, लेट्रिन/ गंदे पानी की नाली ,                                                           | <input checked="" type="checkbox"/>                         | <input type="checkbox"/>                       | <input type="checkbox"/>                        |
| Quality of housing structure घर की बनावट की हालत                                                                                                                                                             | <input type="checkbox"/>                                    | <input type="checkbox"/>                       | <input checked="" type="checkbox"/>             |
| Proximity to public transport like bus stop, बस स्टॉप से नज़दीकी                                                                                                                                             | <input type="checkbox"/>                                    | <input type="checkbox"/>                       | <input checked="" type="checkbox"/>             |
| Proximity to greenery like public parks, gardens पार्क, बगीचे से नज़दीकी                                                                                                                                     | <input checked="" type="checkbox"/>                         | <input type="checkbox"/>                       | <input type="checkbox"/>                        |
| Access to community spaces where you can gather with your neighbours and friends/relatives<br>महल्ले में ऐसी सामुदायिक जगहों तक पहुँच जहाँ आप अपने पड़ोसियों, रिश्तेदारों और दोस्तों से बात और मुलाकात करें? | <input type="checkbox"/>                                    | <input checked="" type="checkbox"/>            | <input type="checkbox"/>                        |
| Cleanliness of streets/neighbourhood (महल्ले की साफ़-सफाई)                                                                                                                                                   | <input checked="" type="checkbox"/>                         | <input type="checkbox"/>                       | <input type="checkbox"/>                        |
| A feeling of belonging to the neighbourhood (महल्ले अपनेपन की भावना)                                                                                                                                         | <input type="checkbox"/>                                    | <input type="checkbox"/>                       | <input checked="" type="checkbox"/>             |
| A good relationship with neighbours and community (पड़ोसियों और समाज के लोगों से अच्छे सम्बन्ध )                                                                                                             | <input type="checkbox"/>                                    | <input type="checkbox"/>                       | <input checked="" type="checkbox"/>             |
| Proximity to employment opportunities (रोज़गार/नौकरी के अवसरों से नज़दीकी)                                                                                                                                   | <input checked="" type="checkbox"/>                         | <input type="checkbox"/>                       | <input type="checkbox"/>                        |
| Proximity to primary & secondary schools प्राथमिक और माध्यमिक स्कूलों से नज़दीकी और पहुँच                                                                                                                    | <input type="checkbox"/>                                    | <input checked="" type="checkbox"/>            | <input type="checkbox"/>                        |
| Proximity to healthcare facilities अस्पताल से नज़दीकी और पहुँच                                                                                                                                               | <input checked="" type="checkbox"/>                         | <input type="checkbox"/>                       | <input type="checkbox"/>                        |
| Sense of safety and security सुरक्षा और सलामती की भावना                                                                                                                                                      | <input type="checkbox"/>                                    | <input type="checkbox"/>                       | <input checked="" type="checkbox"/>             |
| Security of tenure घर/मकान में रहने की सुरक्षा( निकाले जाने के डर से)                                                                                                                                        | <input type="checkbox"/>                                    | <input type="checkbox"/>                       | <input checked="" type="checkbox"/>             |
| Safety from natural and manmade hazards प्राकृतिक आपदा flood                                                                                                                                                 | <input type="checkbox"/>                                    | <input type="checkbox"/>                       | <input checked="" type="checkbox"/>             |

| Of the following, what do you think improves में सुधार                                        | thoda                               | lagbhag                  | bahut jyada                         | bikur na                            |
|-----------------------------------------------------------------------------------------------|-------------------------------------|--------------------------|-------------------------------------|-------------------------------------|
| Proximity to greenery like public parks, gardens पार्क, बगीचे से नज़दीकी                      | very little (+)                     | a bit (++)               | a lot (+++)                         |                                     |
| does improving this___ affects                                                                |                                     |                          |                                     |                                     |
| 1. Proximity to public transport like bus stop                                                | <input type="checkbox"/>            | <input type="checkbox"/> | <input checked="" type="checkbox"/> | <input type="checkbox"/>            |
| 3. Access to community spaces where you can gather with your neighbours and friends/relatives | <input type="checkbox"/>            | <input type="checkbox"/> | <input checked="" type="checkbox"/> | <input type="checkbox"/>            |
| 4. Cleanliness of streets                                                                     | <input type="checkbox"/>            | <input type="checkbox"/> | <input checked="" type="checkbox"/> | <input type="checkbox"/>            |
| 5. Regular waste collection                                                                   | <input type="checkbox"/>            | <input type="checkbox"/> | <input checked="" type="checkbox"/> | <input type="checkbox"/>            |
| 6. A feeling of belonging to the neighbourhood                                                | <input type="checkbox"/>            | <input type="checkbox"/> | <input type="checkbox"/>            | <input checked="" type="checkbox"/> |
| 7. A good relationship with neighbours and community                                          | <input type="checkbox"/>            | <input type="checkbox"/> | <input checked="" type="checkbox"/> | <input type="checkbox"/>            |
| 8. Proximity to employment opportunities                                                      | <input checked="" type="checkbox"/> | <input type="checkbox"/> | <input type="checkbox"/>            | <input type="checkbox"/>            |
|                                                                                               | <input type="checkbox"/>            | <input type="checkbox"/> | <input type="checkbox"/>            | <input type="checkbox"/>            |
|                                                                                               | <input type="checkbox"/>            | <input type="checkbox"/> | <input type="checkbox"/>            | <input type="checkbox"/>            |
|                                                                                               | <input type="checkbox"/>            | <input type="checkbox"/> | <input type="checkbox"/>            | <input type="checkbox"/>            |
|                                                                                               | <input type="checkbox"/>            | <input type="checkbox"/> | <input type="checkbox"/>            | <input type="checkbox"/>            |
|                                                                                               | <input type="checkbox"/>            | <input type="checkbox"/> | <input type="checkbox"/>            | <input type="checkbox"/>            |

| Of the following, what do you think improves                                                                                                                                                    | thoda                               | lagbhag                  | bahut jyada                         | bikur na                            |
|-------------------------------------------------------------------------------------------------------------------------------------------------------------------------------------------------|-------------------------------------|--------------------------|-------------------------------------|-------------------------------------|
| Access to community spaces where you can gather with your neighbours and friends/relatives महल्ले में ऐसी जगहों तक पहुँच जहाँ आप अपने पड़ोसियों, रिश्तेदारों और दोस्तों से बात और मुलाकात करें? | very little (+)                     | a bit (++)               | a lot (+++)                         |                                     |
| does improving this___ affects                                                                                                                                                                  |                                     |                          |                                     |                                     |
| 1. Proximity to public transport like bus stop                                                                                                                                                  | <input checked="" type="checkbox"/> | <input type="checkbox"/> | <input type="checkbox"/>            | <input type="checkbox"/>            |
| 2. Proximity to greenery like public parks, gardens                                                                                                                                             | <input type="checkbox"/>            | <input type="checkbox"/> | <input checked="" type="checkbox"/> | <input type="checkbox"/>            |
| 4. Cleanliness of streets                                                                                                                                                                       | <input type="checkbox"/>            | <input type="checkbox"/> | <input checked="" type="checkbox"/> | <input type="checkbox"/>            |
| 5. Regular waste collection                                                                                                                                                                     | <input type="checkbox"/>            | <input type="checkbox"/> | <input checked="" type="checkbox"/> | <input type="checkbox"/>            |
| 7. A good relationship with neighbours and community                                                                                                                                            | <input type="checkbox"/>            | <input type="checkbox"/> | <input checked="" type="checkbox"/> | <input type="checkbox"/>            |
| 8. Proximity to employment opportunities                                                                                                                                                        | <input type="checkbox"/>            | <input type="checkbox"/> | <input type="checkbox"/>            | <input checked="" type="checkbox"/> |
|                                                                                                                                                                                                 | <input type="checkbox"/>            | <input type="checkbox"/> | <input type="checkbox"/>            | <input type="checkbox"/>            |
|                                                                                                                                                                                                 | <input type="checkbox"/>            | <input type="checkbox"/> | <input type="checkbox"/>            | <input type="checkbox"/>            |
|                                                                                                                                                                                                 | <input type="checkbox"/>            | <input type="checkbox"/> | <input type="checkbox"/>            | <input type="checkbox"/>            |
|                                                                                                                                                                                                 | <input type="checkbox"/>            | <input type="checkbox"/> | <input type="checkbox"/>            | <input type="checkbox"/>            |
|                                                                                                                                                                                                 | <input type="checkbox"/>            | <input type="checkbox"/> | <input type="checkbox"/>            | <input type="checkbox"/>            |

| Of the following, what do you think improves                                                  | thoda                    | lagbhag                             | bahut jyada                         | bikur na                            |
|-----------------------------------------------------------------------------------------------|--------------------------|-------------------------------------|-------------------------------------|-------------------------------------|
| Cleanliness of streets/neighbourhood (महल्ले की साफ़-सफाई)                                    | very little (+)          | a bit (++)                          | a lot (+++)                         |                                     |
| does improving this___ affects                                                                |                          |                                     |                                     |                                     |
| 3. Access to community spaces where you can gather with your neighbours and friends/relatives | <input type="checkbox"/> | <input checked="" type="checkbox"/> | <input type="checkbox"/>            | <input type="checkbox"/>            |
| 6. A feeling of belonging to the neighbourhood                                                | <input type="checkbox"/> | <input type="checkbox"/>            | <input checked="" type="checkbox"/> | <input type="checkbox"/>            |
| 5. Regular waste collection                                                                   | <input type="checkbox"/> | <input type="checkbox"/>            | <input checked="" type="checkbox"/> | <input type="checkbox"/>            |
| 7. A good relationship with neighbours and community                                          | <input type="checkbox"/> | <input checked="" type="checkbox"/> | <input type="checkbox"/>            | <input type="checkbox"/>            |
| 8. Proximity to employment opportunities                                                      | <input type="checkbox"/> | <input checked="" type="checkbox"/> | <input type="checkbox"/>            | <input type="checkbox"/>            |
| 9. Proximity to primary & secondary schools                                                   | <input type="checkbox"/> | <input type="checkbox"/>            | <input type="checkbox"/>            | <input checked="" type="checkbox"/> |
| 10. Proximity to healthcare facilities                                                        | <input type="checkbox"/> | <input type="checkbox"/>            | <input type="checkbox"/>            | <input checked="" type="checkbox"/> |
| 11. Sense of safety and security                                                              | <input type="checkbox"/> | <input type="checkbox"/>            | <input type="checkbox"/>            | <input checked="" type="checkbox"/> |
|                                                                                               | <input type="checkbox"/> | <input type="checkbox"/>            | <input type="checkbox"/>            | <input type="checkbox"/>            |
|                                                                                               | <input type="checkbox"/> | <input type="checkbox"/>            | <input type="checkbox"/>            | <input type="checkbox"/>            |
|                                                                                               | <input type="checkbox"/> | <input type="checkbox"/>            | <input type="checkbox"/>            | <input type="checkbox"/>            |

| Of the following, what do you think improves                               | thoda                    | lagbhag                  | bahut jyada                         | bikur na                 |
|----------------------------------------------------------------------------|--------------------------|--------------------------|-------------------------------------|--------------------------|
| Proximity to employment opportunities (रोज़गार/नौकरी के अवसरों से नज़दीकी) | very little (+)          | a bit (++)               | a lot (+++)                         |                          |
| does improving this___ affects                                             |                          |                          |                                     |                          |
| 1. Proximity to public transport like bus stop                             | <input type="checkbox"/> | <input type="checkbox"/> | <input checked="" type="checkbox"/> | <input type="checkbox"/> |

### Supplementary 2-Ratings from Interviewee 1 Neighbourhood 1

|                                                                                               |                          |                                     |                                     |                                     |
|-----------------------------------------------------------------------------------------------|--------------------------|-------------------------------------|-------------------------------------|-------------------------------------|
| 3. Access to community spaces where you can gather with your neighbours and friends/relatives | <input type="checkbox"/> | <input type="checkbox"/>            | <input checked="" type="checkbox"/> | <input type="checkbox"/>            |
| 4. Cleanliness of streets                                                                     | <input type="checkbox"/> | <input checked="" type="checkbox"/> | <input type="checkbox"/>            | <input type="checkbox"/>            |
| 5. Regular waste collection                                                                   | <input type="checkbox"/> | <input checked="" type="checkbox"/> | <input type="checkbox"/>            | <input type="checkbox"/>            |
| 6. A feeling of belonging to the neighbourhood                                                | <input type="checkbox"/> | <input checked="" type="checkbox"/> | <input type="checkbox"/>            | <input type="checkbox"/>            |
| 7. A good relationship with neighbours and community                                          | <input type="checkbox"/> | <input checked="" type="checkbox"/> | <input type="checkbox"/>            | <input type="checkbox"/>            |
| 9. Proximity to primary & secondary schools                                                   | <input type="checkbox"/> | <input type="checkbox"/>            | <input type="checkbox"/>            | <input checked="" type="checkbox"/> |
| 10. Proximity to healthcare facilities                                                        | <input type="checkbox"/> | <input type="checkbox"/>            | <input type="checkbox"/>            | <input checked="" type="checkbox"/> |
| 11. Sense of safety and security                                                              | <input type="checkbox"/> | <input checked="" type="checkbox"/> | <input type="checkbox"/>            | <input type="checkbox"/>            |
|                                                                                               | <input type="checkbox"/> | <input type="checkbox"/>            | <input type="checkbox"/>            | <input type="checkbox"/>            |
|                                                                                               | <input type="checkbox"/> | <input type="checkbox"/>            | <input type="checkbox"/>            | <input type="checkbox"/>            |

[illegible][illegible]

## Supplementary 3-Ratings from Interviewee 2 Neighbourhood 1

|                                                                                                                                                                                                              | not at all                          | a bit                               | a lot                               |
|--------------------------------------------------------------------------------------------------------------------------------------------------------------------------------------------------------------|-------------------------------------|-------------------------------------|-------------------------------------|
| 1 How much do you like your neighbourhood?<br>आप अपने गली-महल्ले को कितना पसंद करते हैं?                                                                                                                     | <input type="checkbox"/>            | <input type="checkbox"/>            | <input checked="" type="checkbox"/> |
| 2 How would you rate the following in your neighbourhood?<br>आप अपने गली-महल्ले में इन चीजों को कैसे रेट करेंगे? सड़क                                                                                        | बिल्कुल नहीं,<br>bad                | , थोड़ा सा<br>okay                  | बहुत ज्यादा<br>good                 |
| Access to basic amenities like household level tap water, electricity, toilet/sewerage<br>घर में नलके का पानी, बिजली, लेटिन/गंदे पानी की नाली                                                                | <input type="checkbox"/>            | <input checked="" type="checkbox"/> | <input type="checkbox"/>            |
| Quality of housing structure घर की बनावट की हालत                                                                                                                                                             | <input type="checkbox"/>            | <input type="checkbox"/>            | <input checked="" type="checkbox"/> |
| Proximity to public transport like bus stop, बस स्टॉप से नज़दीकी                                                                                                                                             | <input type="checkbox"/>            | <input type="checkbox"/>            | <input checked="" type="checkbox"/> |
| Proximity to greenery like public parks, gardens पार्क, बगीचे से नज़दीकी                                                                                                                                     | <input checked="" type="checkbox"/> | <input type="checkbox"/>            | <input type="checkbox"/>            |
| Access to community spaces where you can gather with your neighbours and friends/relatives<br>महल्ले में ऐसी सामुदायिक जगहों तक पहुँच जहाँ आप अपने पड़ोसियों, रिश्तेदारों और दोस्तों से बात और मुलाकात करें? | <input checked="" type="checkbox"/> | <input type="checkbox"/>            | <input type="checkbox"/>            |
| Cleanliness of streets/neighbourhood (महल्ले की सफ़ाई)                                                                                                                                                       | <input checked="" type="checkbox"/> | <input type="checkbox"/>            | <input type="checkbox"/>            |
| A feeling of belonging to the neighbourhood (महल्ले अपनेपन की भावना)                                                                                                                                         | <input type="checkbox"/>            | <input type="checkbox"/>            | <input checked="" type="checkbox"/> |
| A good relationship with neighbours and community (पड़ोसियों और समाज के लोगों से अच्छे सम्बन्ध)                                                                                                              | <input type="checkbox"/>            | <input type="checkbox"/>            | <input checked="" type="checkbox"/> |
| Proximity to employment opportunities (रोज़गार/नौकरी के अवसरों से नज़दीकी)                                                                                                                                   | <input type="checkbox"/>            | <input type="checkbox"/>            | <input type="checkbox"/>            |
| Proximity to primary & secondary schools प्राथमिक और माध्यमिक स्कूलों से नज़दीकी और पहुँच                                                                                                                    | <input type="checkbox"/>            | <input type="checkbox"/>            | <input checked="" type="checkbox"/> |
| Proximity to healthcare facilities अस्पताल से नज़दीकी और पहुँच                                                                                                                                               | <input type="checkbox"/>            | <input type="checkbox"/>            | <input type="checkbox"/>            |
| Sense of safety and security सुरक्षा और सलामती की भावना                                                                                                                                                      | <input type="checkbox"/>            | <input type="checkbox"/>            | <input checked="" type="checkbox"/> |
| Security of tenure घर/मकान में रहने की सुरक्षा (निकाले जाने के डर से)                                                                                                                                        | <input type="checkbox"/>            | <input type="checkbox"/>            | <input type="checkbox"/>            |
| Safety from natural and manmade hazards प्राकृतिक आपदा flood                                                                                                                                                 | <input type="checkbox"/>            | <input type="checkbox"/>            | <input checked="" type="checkbox"/> |

| Of the following, what do you think improves में सुधार                                                     | thoda<br>very little (+)            | lagbhag<br>a bit (++)               | bahut jyada<br>a lot (+++) | bikul na                 |
|------------------------------------------------------------------------------------------------------------|-------------------------------------|-------------------------------------|----------------------------|--------------------------|
| Proximity to greenery like public parks, gardens पार्क, बगीचे से नज़दीकी<br>does improving this___ affects |                                     |                                     |                            |                          |
| 1. Proximity to public transport like bus stop                                                             | <input type="checkbox"/>            | <input checked="" type="checkbox"/> | <input type="checkbox"/>   | <input type="checkbox"/> |
| 3. Access to community spaces where you can gather with your neighbours and friends/relatives              | <input checked="" type="checkbox"/> | <input type="checkbox"/>            | <input type="checkbox"/>   | <input type="checkbox"/> |
| 4. Cleanliness of streets                                                                                  | <input type="checkbox"/>            | <input checked="" type="checkbox"/> | <input type="checkbox"/>   | <input type="checkbox"/> |
| 5. Regular waste collection                                                                                | <input type="checkbox"/>            | <input type="checkbox"/>            | <input type="checkbox"/>   | <input type="checkbox"/> |
| 6. A feeling of belonging to the neighbourhood                                                             | <input type="checkbox"/>            | <input checked="" type="checkbox"/> | <input type="checkbox"/>   | <input type="checkbox"/> |
| 7. A good relationship with neighbours and community                                                       | <input type="checkbox"/>            | <input checked="" type="checkbox"/> | <input type="checkbox"/>   | <input type="checkbox"/> |
| 8. Proximity to employment opportunities                                                                   | <input type="checkbox"/>            | <input type="checkbox"/>            | <input type="checkbox"/>   | <input type="checkbox"/> |
| 9. Proximity to primary & secondary schools                                                                | <input type="checkbox"/>            | <input type="checkbox"/>            | <input type="checkbox"/>   | <input type="checkbox"/> |
| 10. Proximity to healthcare facilities                                                                     | <input type="checkbox"/>            | <input type="checkbox"/>            | <input type="checkbox"/>   | <input type="checkbox"/> |
| 11. Sense of safety and security                                                                           | <input type="checkbox"/>            | <input type="checkbox"/>            | <input type="checkbox"/>   | <input type="checkbox"/> |

| Of the following, what do you think improves में सुधार                                                                                        | thoda<br>very little (+) | lagbhag<br>a bit (++)    | bahut jyada<br>a lot (+++)          | bikul na                 |
|-----------------------------------------------------------------------------------------------------------------------------------------------|--------------------------|--------------------------|-------------------------------------|--------------------------|
| Access to community spaces where you can gather with your neighbours and friends/relatives महल्ले में एसा स<br>does improving this___ affects |                          |                          |                                     |                          |
| 1. Proximity to public transport like bus stop                                                                                                | <input type="checkbox"/> | <input type="checkbox"/> | <input type="checkbox"/>            | <input type="checkbox"/> |
| 3. Access to community spaces where you can gather with your neighbours and friends/relatives                                                 | <input type="checkbox"/> | <input type="checkbox"/> | <input type="checkbox"/>            | <input type="checkbox"/> |
| 4. Cleanliness of streets                                                                                                                     | <input type="checkbox"/> | <input type="checkbox"/> | <input checked="" type="checkbox"/> | <input type="checkbox"/> |
| 5. Regular waste collection                                                                                                                   | <input type="checkbox"/> | <input type="checkbox"/> | <input type="checkbox"/>            | <input type="checkbox"/> |
| 6. A feeling of belonging to the neighbourhood                                                                                                | <input type="checkbox"/> | <input type="checkbox"/> | <input type="checkbox"/>            | <input type="checkbox"/> |
| 7. A good relationship with neighbours and community                                                                                          | <input type="checkbox"/> | <input type="checkbox"/> | <input checked="" type="checkbox"/> | <input type="checkbox"/> |
| 8. Proximity to employment opportunities                                                                                                      | <input type="checkbox"/> | <input type="checkbox"/> | <input type="checkbox"/>            | <input type="checkbox"/> |
| 9. Proximity to primary & secondary schools                                                                                                   | <input type="checkbox"/> | <input type="checkbox"/> | <input type="checkbox"/>            | <input type="checkbox"/> |
| 10. Proximity to healthcare facilities                                                                                                        | <input type="checkbox"/> | <input type="checkbox"/> | <input type="checkbox"/>            | <input type="checkbox"/> |
| 11. Sense of safety and security                                                                                                              | <input type="checkbox"/> | <input type="checkbox"/> | <input type="checkbox"/>            | <input type="checkbox"/> |

| Of the following, what do you think improves में सुधार                                                       | thoda<br>very little (+) | lagbhag<br>a bit (++)    | bahut jyada<br>a lot (+++)          | bikul na                 |
|--------------------------------------------------------------------------------------------------------------|--------------------------|--------------------------|-------------------------------------|--------------------------|
| Proximity to employment opportunities (रोज़गार/नौकरी के अवसरों से नज़दीकी)<br>does improving this___ affects |                          |                          |                                     |                          |
| 1. Proximity to public transport like bus stop                                                               | <input type="checkbox"/> | <input type="checkbox"/> | <input checked="" type="checkbox"/> | <input type="checkbox"/> |
| 3. Access to community spaces where you can gather with your neighbours and friends/relatives                | <input type="checkbox"/> | <input type="checkbox"/> | <input checked="" type="checkbox"/> | <input type="checkbox"/> |
| 4. Cleanliness of streets                                                                                    | <input type="checkbox"/> | <input type="checkbox"/> | <input type="checkbox"/>            | <input type="checkbox"/> |
| 5. Regular waste collection                                                                                  | <input type="checkbox"/> | <input type="checkbox"/> | <input type="checkbox"/>            | <input type="checkbox"/> |
| 6. A feeling of belonging to the neighbourhood                                                               | <input type="checkbox"/> | <input type="checkbox"/> | <input type="checkbox"/>            | <input type="checkbox"/> |
| 7. A good relationship with neighbours and community                                                         | <input type="checkbox"/> | <input type="checkbox"/> | <input type="checkbox"/>            | <input type="checkbox"/> |
| 8. Proximity to employment opportunities                                                                     | <input type="checkbox"/> | <input type="checkbox"/> | <input type="checkbox"/>            | <input type="checkbox"/> |
| 9. Proximity to primary & secondary schools                                                                  | <input type="checkbox"/> | <input type="checkbox"/> | <input type="checkbox"/>            | <input type="checkbox"/> |
| 10. Proximity to healthcare facilities                                                                       | <input type="checkbox"/> | <input type="checkbox"/> | <input type="checkbox"/>            | <input type="checkbox"/> |
| 11. Sense of safety and security                                                                             | <input type="checkbox"/> | <input type="checkbox"/> | <input type="checkbox"/>            | <input type="checkbox"/> |

| Of the following, what do you think improves में सुधार                                           | thoda<br>very little (+) | lagbhag<br>a bit (++)    | bahut jyada<br>a lot (+++)          | bikul na                 |
|--------------------------------------------------------------------------------------------------|--------------------------|--------------------------|-------------------------------------|--------------------------|
| Proximity to healthcare facilities अस्पताल से नज़दीकी और पहुँच<br>does improving this___ affects |                          |                          |                                     |                          |
| 1. Proximity to public transport like bus stop                                                   | <input type="checkbox"/> | <input type="checkbox"/> | <input checked="" type="checkbox"/> | <input type="checkbox"/> |
| 3. Access to community spaces where you can gather with your neighbours and friends/relatives    | <input type="checkbox"/> | <input type="checkbox"/> | <input type="checkbox"/>            | <input type="checkbox"/> |
| 4. Cleanliness of streets                                                                        | <input type="checkbox"/> | <input type="checkbox"/> | <input type="checkbox"/>            | <input type="checkbox"/> |
| 5. Regular waste collection                                                                      | <input type="checkbox"/> | <input type="checkbox"/> | <input type="checkbox"/>            | <input type="checkbox"/> |
| 6. A feeling of belonging to the neighbourhood                                                   | <input type="checkbox"/> | <input type="checkbox"/> | <input type="checkbox"/>            | <input type="checkbox"/> |
| 7. A good relationship with neighbours and community                                             | <input type="checkbox"/> | <input type="checkbox"/> | <input type="checkbox"/>            | <input type="checkbox"/> |
| 8. Proximity to employment opportunities                                                         | <input type="checkbox"/> | <input type="checkbox"/> | <input type="checkbox"/>            | <input type="checkbox"/> |
| 9. Proximity to primary & secondary schools                                                      | <input type="checkbox"/> | <input type="checkbox"/> | <input type="checkbox"/>            | <input type="checkbox"/> |
| 10. Proximity to healthcare facilities                                                           | <input type="checkbox"/> | <input type="checkbox"/> | <input type="checkbox"/>            | <input type="checkbox"/> |
| 11. Sense of safety and security                                                                 | <input type="checkbox"/> | <input type="checkbox"/> | <input type="checkbox"/>            | <input type="checkbox"/> |

Of the following, what do you think improves में सुधार

## Supplementary 4-Ratings from Interviewee 3 Neighbourhood 1

|                                                                                                                                                                                                              | not at all                          | a bit                               | a lot                               |
|--------------------------------------------------------------------------------------------------------------------------------------------------------------------------------------------------------------|-------------------------------------|-------------------------------------|-------------------------------------|
| 1 How much do you like your neighbourhood?<br>आप अपने गली-महल्ले को कितना पसंद करते हैं?                                                                                                                     | <input type="checkbox"/>            | <input type="checkbox"/>            | <input checked="" type="checkbox"/> |
| 2 How would you rate the following in your neighbourhood?<br>आप अपने गली-महल्ले में इन चीजों को कैसे रेट करेंगे? संतुष्ट                                                                                     | बिल्कुल नहीं,<br>bad                | , थोड़ा सा<br>okay                  | बहुत ज्यादा<br>good                 |
| Access to basic amenities like household level tap water, electricity, toilet/sewerage<br>घर में नलके का पानी, बिजली, लेट्रिन/ गंदे पानी की नाली ,                                                           | <input type="checkbox"/>            | <input checked="" type="checkbox"/> | <input type="checkbox"/>            |
| Quality of housing structure घर की बनावट की हालत                                                                                                                                                             | <input checked="" type="checkbox"/> | <input type="checkbox"/>            | <input type="checkbox"/>            |
| Proximity to public transport like bus stop, बस स्टॉप से नज़दीकी                                                                                                                                             | <input type="checkbox"/>            | <input type="checkbox"/>            | <input checked="" type="checkbox"/> |
| Proximity to greenery like public parks, gardens पार्क, बगीचे से नज़दीकी                                                                                                                                     | <input checked="" type="checkbox"/> | <input type="checkbox"/>            | <input type="checkbox"/>            |
| Access to community spaces where you can gather with your neighbours and friends/relatives<br>महल्ले में ऐसी सामुदायिक जगहों तक पहुँच जहाँ आप अपने पड़ोसियों, रिश्तेदारों और दोस्तों से बात और मुलाकात करें? | <input checked="" type="checkbox"/> | <input type="checkbox"/>            | <input type="checkbox"/>            |
| Cleanliness of streets/neighbourhood (महल्ले की साफ़-सफाई)                                                                                                                                                   | <input type="checkbox"/>            | <input type="checkbox"/>            | <input checked="" type="checkbox"/> |
| A feeling of belonging to the neighbourhood (महल्ले अपनेपन की भावना)                                                                                                                                         | <input type="checkbox"/>            | <input type="checkbox"/>            | <input checked="" type="checkbox"/> |
| A good relationship with neighbours and community (पड़ोसियों और समाज के लोगों से अच्छे सम्बन्ध )                                                                                                             | <input type="checkbox"/>            | <input type="checkbox"/>            | <input checked="" type="checkbox"/> |
| Proximity to employment opportunities (रोज़गार/नौकरी के अवसरों से नज़दीकी)                                                                                                                                   | <input checked="" type="checkbox"/> | <input type="checkbox"/>            | <input type="checkbox"/>            |
| Proximity to primary & secondary schools प्राथमिक और माध्यमिक स्कूलों से नज़दीकी और पहुँच                                                                                                                    | <input type="checkbox"/>            | <input checked="" type="checkbox"/> | <input type="checkbox"/>            |
| Proximity to healthcare facilities अस्पताल से नज़दीकी और पहुँच                                                                                                                                               | <input type="checkbox"/>            | <input type="checkbox"/>            | <input checked="" type="checkbox"/> |
| Sense of safety and security सुरक्षा और सलामती की भावना                                                                                                                                                      | <input type="checkbox"/>            | <input checked="" type="checkbox"/> | <input type="checkbox"/>            |
| Security of tenure घर/मकान में रहने की सुरक्षा( निकाले जाने के डर से)                                                                                                                                        | <input checked="" type="checkbox"/> | <input type="checkbox"/>            | <input checked="" type="checkbox"/> |
| Safety from natural and manmade hazards प्राकृतिक आपदा flood                                                                                                                                                 | <input type="checkbox"/>            | <input type="checkbox"/>            | <input checked="" type="checkbox"/> |

| Of the following, what do you think improves में सुधार                                        | thoda                    | lagbhag                             | bahut jyada              | bikul na                            |
|-----------------------------------------------------------------------------------------------|--------------------------|-------------------------------------|--------------------------|-------------------------------------|
| Proximity to greenery like public parks, gardens पार्क, बगीचे से नज़दीकी                      | very little (+)          | a bit (++)                          | a lot (+++)              |                                     |
| 1. Proximity to public transport like bus stop                                                | <input type="checkbox"/> | <input checked="" type="checkbox"/> | <input type="checkbox"/> | <input type="checkbox"/>            |
| 3. Access to community spaces where you can gather with your neighbours and friends/relatives | <input type="checkbox"/> | <input checked="" type="checkbox"/> | <input type="checkbox"/> | <input type="checkbox"/>            |
| 4. Cleanliness of streets                                                                     | <input type="checkbox"/> | <input type="checkbox"/>            | <input type="checkbox"/> | <input checked="" type="checkbox"/> |
| 11. Sense of safety and security                                                              | <input type="checkbox"/> | <input type="checkbox"/>            | <input type="checkbox"/> | <input type="checkbox"/>            |
|                                                                                               | <input type="checkbox"/> | <input type="checkbox"/>            | <input type="checkbox"/> | <input type="checkbox"/>            |
|                                                                                               | <input type="checkbox"/> | <input type="checkbox"/>            | <input type="checkbox"/> | <input type="checkbox"/>            |
|                                                                                               | <input type="checkbox"/> | <input type="checkbox"/>            | <input type="checkbox"/> | <input type="checkbox"/>            |
|                                                                                               | <input type="checkbox"/> | <input type="checkbox"/>            | <input type="checkbox"/> | <input type="checkbox"/>            |
|                                                                                               | <input type="checkbox"/> | <input type="checkbox"/>            | <input type="checkbox"/> | <input type="checkbox"/>            |
|                                                                                               | <input type="checkbox"/> | <input type="checkbox"/>            | <input type="checkbox"/> | <input type="checkbox"/>            |
|                                                                                               | <input type="checkbox"/> | <input type="checkbox"/>            | <input type="checkbox"/> | <input type="checkbox"/>            |
|                                                                                               | <input type="checkbox"/> | <input type="checkbox"/>            | <input type="checkbox"/> | <input type="checkbox"/>            |
|                                                                                               | <input type="checkbox"/> | <input type="checkbox"/>            | <input type="checkbox"/> | <input type="checkbox"/>            |

| Of the following, what do you think improves                                              | thoda                    | lagbhag                  | bahut jyada                         | bikul na                 |
|-------------------------------------------------------------------------------------------|--------------------------|--------------------------|-------------------------------------|--------------------------|
| Proximity to primary & secondary schools प्राथमिक और माध्यमिक स्कूलों से नज़दीकी और पहुँच | very little (+)          | a bit (++)               | a lot (+++)                         |                          |
| 1. Proximity to public transport like bus stop                                            | <input type="checkbox"/> | <input type="checkbox"/> | <input checked="" type="checkbox"/> | <input type="checkbox"/> |
| 4. Cleanliness of streets                                                                 | <input type="checkbox"/> | <input type="checkbox"/> | <input checked="" type="checkbox"/> | <input type="checkbox"/> |
| 11. Sense of safety and security                                                          | <input type="checkbox"/> | <input type="checkbox"/> | <input checked="" type="checkbox"/> | <input type="checkbox"/> |
|                                                                                           | <input type="checkbox"/> | <input type="checkbox"/> | <input type="checkbox"/>            | <input type="checkbox"/> |
|                                                                                           | <input type="checkbox"/> | <input type="checkbox"/> | <input type="checkbox"/>            | <input type="checkbox"/> |
|                                                                                           | <input type="checkbox"/> | <input type="checkbox"/> | <input type="checkbox"/>            | <input type="checkbox"/> |
|                                                                                           | <input type="checkbox"/> | <input type="checkbox"/> | <input type="checkbox"/>            | <input type="checkbox"/> |
|                                                                                           | <input type="checkbox"/> | <input type="checkbox"/> | <input type="checkbox"/>            | <input type="checkbox"/> |
|                                                                                           | <input type="checkbox"/> | <input type="checkbox"/> | <input type="checkbox"/>            | <input type="checkbox"/> |
|                                                                                           | <input type="checkbox"/> | <input type="checkbox"/> | <input type="checkbox"/>            | <input type="checkbox"/> |
|                                                                                           | <input type="checkbox"/> | <input type="checkbox"/> | <input type="checkbox"/>            | <input type="checkbox"/> |
|                                                                                           | <input type="checkbox"/> | <input type="checkbox"/> | <input type="checkbox"/>            | <input type="checkbox"/> |

| Of the following, what do you think improves                                                                                                                                                              | thoda                    | lagbhag                             | bahut jyada                         | bikul na                 |
|-----------------------------------------------------------------------------------------------------------------------------------------------------------------------------------------------------------|--------------------------|-------------------------------------|-------------------------------------|--------------------------|
| Access to community spaces where you can gather with your neighbours and friends/relatives महल्ले में ऐसी सामुदायिक जगहों तक पहुँच जहाँ आप अपने पड़ोसियों, रिश्तेदारों और दोस्तों से बात और मुलाकात करें? | very little (+)          | a bit (++)                          | a lot (+++)                         |                          |
| 2. Proximity to greenery like public parks, gardens                                                                                                                                                       | <input type="checkbox"/> | <input type="checkbox"/>            | <input checked="" type="checkbox"/> | <input type="checkbox"/> |
| 4. Cleanliness of streets                                                                                                                                                                                 | <input type="checkbox"/> | <input type="checkbox"/>            | <input checked="" type="checkbox"/> | <input type="checkbox"/> |
| 6. A feeling of belonging to the neighbourhood                                                                                                                                                            | <input type="checkbox"/> | <input checked="" type="checkbox"/> | <input type="checkbox"/>            | <input type="checkbox"/> |
| 7. A good relationship with neighbours and community                                                                                                                                                      | <input type="checkbox"/> | <input checked="" type="checkbox"/> | <input type="checkbox"/>            | <input type="checkbox"/> |
| 11. Sense of safety and security                                                                                                                                                                          | <input type="checkbox"/> | <input type="checkbox"/>            | <input checked="" type="checkbox"/> | <input type="checkbox"/> |
|                                                                                                                                                                                                           | <input type="checkbox"/> | <input type="checkbox"/>            | <input type="checkbox"/>            | <input type="checkbox"/> |
|                                                                                                                                                                                                           | <input type="checkbox"/> | <input type="checkbox"/>            | <input type="checkbox"/>            | <input type="checkbox"/> |
|                                                                                                                                                                                                           | <input type="checkbox"/> | <input type="checkbox"/>            | <input type="checkbox"/>            | <input type="checkbox"/> |
|                                                                                                                                                                                                           | <input type="checkbox"/> | <input type="checkbox"/>            | <input type="checkbox"/>            | <input type="checkbox"/> |
|                                                                                                                                                                                                           | <input type="checkbox"/> | <input type="checkbox"/>            | <input type="checkbox"/>            | <input type="checkbox"/> |
|                                                                                                                                                                                                           | <input type="checkbox"/> | <input type="checkbox"/>            | <input type="checkbox"/>            | <input type="checkbox"/> |

| Of the following, what do you think improves                               | thoda                    | lagbhag                  | bahut jyada                         | bikul na                 |
|----------------------------------------------------------------------------|--------------------------|--------------------------|-------------------------------------|--------------------------|
| Proximity to employment opportunities (रोज़गार/नौकरी के अवसरों से नज़दीकी) | very little (+)          | a bit (++)               | a lot (+++)                         |                          |
| 1. Proximity to public transport like bus stop                             | <input type="checkbox"/> | <input type="checkbox"/> | <input checked="" type="checkbox"/> | <input type="checkbox"/> |

#### Supplementary 4-Ratings from Interviewee 3 Neighbourhood 1

[illegible][illegible]



## Supplementary 5-Ratings from Interviewee 1 Neighbourhood 2

|                                                                                                                                                                                                              | not at all                          | a bit                               | a lot                               |
|--------------------------------------------------------------------------------------------------------------------------------------------------------------------------------------------------------------|-------------------------------------|-------------------------------------|-------------------------------------|
| 1 How much do you like your neighbourhood?<br>आप अपने गली-महल्ले को कितना पसंद करते हैं?                                                                                                                     | <input type="checkbox"/>            | <input checked="" type="checkbox"/> | <input type="checkbox"/>            |
| 2 How would you rate the following in your neighbourhood?<br>आप अपने गली-महल्ले में इन चीजों को कैसे रेट करेंगे? संतुष्ट                                                                                     | bad                                 | okay                                | good                                |
| Access to basic amenities like household level tap water, electricity, toilet/sewerage<br>घर में नलके का पानी, बिजली, लेट्रिन/गंदे पानी की नाली                                                              | <input checked="" type="checkbox"/> | <input type="checkbox"/>            | <input type="checkbox"/>            |
| Quality of housing structure घर की बनावट की हालत                                                                                                                                                             | <input type="checkbox"/>            | <input type="checkbox"/>            | <input checked="" type="checkbox"/> |
| Proximity to public transport like bus stop, बस स्टॉप से नज़दीकी                                                                                                                                             | <input type="checkbox"/>            | <input type="checkbox"/>            | <input checked="" type="checkbox"/> |
| Proximity to greenery like public parks, gardens पार्क, बगीचे से नज़दीकी                                                                                                                                     | <input type="checkbox"/>            | <input checked="" type="checkbox"/> | <input type="checkbox"/>            |
| Access to community spaces where you can gather with your neighbours and friends/relatives<br>महल्ले में ऐसी सामुदायिक जगहों तक पहुँच जहाँ आप अपने पड़ोसियों, रिश्तेदारों और दोस्तों से बात और मुलाकात करें? | <input checked="" type="checkbox"/> | <input type="checkbox"/>            | <input type="checkbox"/>            |
| Cleanliness of streets/neighbourhood (महल्ले की साफ़-सफाई)                                                                                                                                                   | <input checked="" type="checkbox"/> | <input type="checkbox"/>            | <input type="checkbox"/>            |
| A feeling of belonging to the neighbourhood (महल्ले अपनेपन की भावना)                                                                                                                                         | <input type="checkbox"/>            | <input type="checkbox"/>            | <input checked="" type="checkbox"/> |
| A good relationship with neighbours and community (पड़ोसियों और समाज के लोगों से अच्छे सम्बन्ध)                                                                                                              | <input type="checkbox"/>            | <input type="checkbox"/>            | <input checked="" type="checkbox"/> |
| Proximity to employment opportunities (रोज़गार/नौकरी के अवसरों से नज़दीकी)                                                                                                                                   | <input type="checkbox"/>            | <input checked="" type="checkbox"/> | <input type="checkbox"/>            |
| Proximity to primary & secondary schools प्राथमिक और माध्यमिक स्कूलों से नज़दीकी और पहुँच                                                                                                                    | <input type="checkbox"/>            | <input type="checkbox"/>            | <input checked="" type="checkbox"/> |
| Proximity to healthcare facilities अस्पताल से नज़दीकी और पहुँच                                                                                                                                               | <input type="checkbox"/>            | <input type="checkbox"/>            | <input checked="" type="checkbox"/> |
| Sense of safety and security सुरक्षा और सलामती की भावना                                                                                                                                                      | <input type="checkbox"/>            | <input type="checkbox"/>            | <input checked="" type="checkbox"/> |
| Security of tenure घर/मकान में रहने की सुरक्षा (निकाले जाने के डर से)                                                                                                                                        | <input type="checkbox"/>            | <input type="checkbox"/>            | <input type="checkbox"/>            |
| Safety from natural and manmade hazards प्राकृतिक आपदा flood                                                                                                                                                 | <input type="checkbox"/>            | <input type="checkbox"/>            | <input type="checkbox"/>            |

| Of the following, what do you think improves में सुधार                                        | thoda                    | lagbhag                             | bahut jyada                         | bikul na                            |
|-----------------------------------------------------------------------------------------------|--------------------------|-------------------------------------|-------------------------------------|-------------------------------------|
| Proximity to greenery like public parks, gardens पार्क, बगीचे से नज़दीकी                      | very little (+)          | a bit (++)                          | a lot (+++)                         |                                     |
| does improving this____ affects                                                               |                          |                                     |                                     |                                     |
| 1. Proximity to public transport like bus stop                                                | <input type="checkbox"/> | <input checked="" type="checkbox"/> | <input type="checkbox"/>            | <input type="checkbox"/>            |
| 2. Proximity to greenery like public parks, gardens                                           | <input type="checkbox"/> | <input type="checkbox"/>            | <input type="checkbox"/>            | <input type="checkbox"/>            |
| 3. Access to community spaces where you can gather with your neighbours and friends/relatives | <input type="checkbox"/> | <input checked="" type="checkbox"/> | <input type="checkbox"/>            | <input type="checkbox"/>            |
| 4. Cleanliness of streets                                                                     | <input type="checkbox"/> | <input type="checkbox"/>            | <input type="checkbox"/>            | <input checked="" type="checkbox"/> |
| 5. A feeling of belonging to the neighbourhood                                                | <input type="checkbox"/> | <input checked="" type="checkbox"/> | <input type="checkbox"/>            | <input type="checkbox"/>            |
| 6. A good relationship with neighbours and community                                          | <input type="checkbox"/> | <input type="checkbox"/>            | <input checked="" type="checkbox"/> | <input type="checkbox"/>            |
| 7. Proximity to employment opportunities                                                      | <input type="checkbox"/> | <input type="checkbox"/>            | <input type="checkbox"/>            | <input checked="" type="checkbox"/> |
| 8. Proximity to primary & secondary schools                                                   | <input type="checkbox"/> | <input type="checkbox"/>            | <input type="checkbox"/>            | <input checked="" type="checkbox"/> |
| 9. Proximity to healthcare facilities                                                         | <input type="checkbox"/> | <input type="checkbox"/>            | <input type="checkbox"/>            | <input checked="" type="checkbox"/> |
| 10. Sense of safety and security                                                              | <input type="checkbox"/> | <input type="checkbox"/>            | <input type="checkbox"/>            | <input checked="" type="checkbox"/> |

| Of the following, what do you think improves में सुधार                                                                                                                                          | thoda                    | lagbhag                             | bahut jyada                         | bikul na                 |
|-------------------------------------------------------------------------------------------------------------------------------------------------------------------------------------------------|--------------------------|-------------------------------------|-------------------------------------|--------------------------|
| Access to community spaces where you can gather with your neighbours and friends/relatives महल्ले में ऐसी जगहों तक पहुँच जहाँ आप अपने पड़ोसियों, रिश्तेदारों और दोस्तों से बात और मुलाकात करें? | very little (+)          | a bit (++)                          | a lot (+++)                         |                          |
| does improving this____ affects                                                                                                                                                                 |                          |                                     |                                     |                          |
| 1. Proximity to public transport like bus stop                                                                                                                                                  | <input type="checkbox"/> | <input type="checkbox"/>            | <input type="checkbox"/>            | <input type="checkbox"/> |
| 2. Proximity to greenery like public parks, gardens                                                                                                                                             | <input type="checkbox"/> | <input type="checkbox"/>            | <input checked="" type="checkbox"/> | <input type="checkbox"/> |
| 3. Access to community spaces where you can gather with your neighbours and friends/relatives                                                                                                   | <input type="checkbox"/> | <input type="checkbox"/>            | <input type="checkbox"/>            | <input type="checkbox"/> |
| 4. Cleanliness of streets                                                                                                                                                                       | <input type="checkbox"/> | <input type="checkbox"/>            | <input checked="" type="checkbox"/> | <input type="checkbox"/> |
| 5. A feeling of belonging to the neighbourhood                                                                                                                                                  | <input type="checkbox"/> | <input type="checkbox"/>            | <input type="checkbox"/>            | <input type="checkbox"/> |
| 6. A good relationship with neighbours and community                                                                                                                                            | <input type="checkbox"/> | <input checked="" type="checkbox"/> | <input type="checkbox"/>            | <input type="checkbox"/> |
| 7. Proximity to employment opportunities                                                                                                                                                        | <input type="checkbox"/> | <input type="checkbox"/>            | <input type="checkbox"/>            | <input type="checkbox"/> |
| 8. Proximity to primary & secondary schools                                                                                                                                                     | <input type="checkbox"/> | <input type="checkbox"/>            | <input type="checkbox"/>            | <input type="checkbox"/> |
| 9. Proximity to healthcare facilities                                                                                                                                                           | <input type="checkbox"/> | <input type="checkbox"/>            | <input type="checkbox"/>            | <input type="checkbox"/> |
| 10. Sense of safety and security                                                                                                                                                                | <input type="checkbox"/> | <input type="checkbox"/>            | <input type="checkbox"/>            | <input type="checkbox"/> |

| Of the following, what do you think improves में सुधार                                        | thoda                    | lagbhag                  | bahut jyada                         | bikul na                 |
|-----------------------------------------------------------------------------------------------|--------------------------|--------------------------|-------------------------------------|--------------------------|
| Cleanliness of streets/neighbourhood (महल्ले की साफ़-सफाई)                                    | very little (+)          | a bit (++)               | a lot (+++)                         |                          |
| does improving this____ affects                                                               |                          |                          |                                     |                          |
| 1. Proximity to public transport like bus stop                                                | <input type="checkbox"/> | <input type="checkbox"/> | <input type="checkbox"/>            | <input type="checkbox"/> |
| 2. Proximity to greenery like public parks, gardens                                           | <input type="checkbox"/> | <input type="checkbox"/> | <input type="checkbox"/>            | <input type="checkbox"/> |
| 3. Access to community spaces where you can gather with your neighbours and friends/relatives | <input type="checkbox"/> | <input type="checkbox"/> | <input type="checkbox"/>            | <input type="checkbox"/> |
| 4. Cleanliness of streets                                                                     | <input type="checkbox"/> | <input type="checkbox"/> | <input type="checkbox"/>            | <input type="checkbox"/> |
| 5. A feeling of belonging to the neighbourhood                                                | <input type="checkbox"/> | <input type="checkbox"/> | <input type="checkbox"/>            | <input type="checkbox"/> |
| 6. A good relationship with neighbours and community                                          | <input type="checkbox"/> | <input type="checkbox"/> | <input checked="" type="checkbox"/> | <input type="checkbox"/> |
| 7. Proximity to employment opportunities                                                      | <input type="checkbox"/> | <input type="checkbox"/> | <input type="checkbox"/>            | <input type="checkbox"/> |
| 8. Proximity to primary & secondary schools                                                   | <input type="checkbox"/> | <input type="checkbox"/> | <input type="checkbox"/>            | <input type="checkbox"/> |
| 9. Proximity to healthcare facilities                                                         | <input type="checkbox"/> | <input type="checkbox"/> | <input type="checkbox"/>            | <input type="checkbox"/> |
| 10. Sense of safety and security                                                              | <input type="checkbox"/> | <input type="checkbox"/> | <input type="checkbox"/>            | <input type="checkbox"/> |

| Of the following, what do you think improves में सुधार                                        | thoda                    | lagbhag                  | bahut jyada                         | bikul na                 |
|-----------------------------------------------------------------------------------------------|--------------------------|--------------------------|-------------------------------------|--------------------------|
| Proximity to employment opportunities (रोज़गार/नौकरी के अवसरों से नज़दीकी)                    | very little (+)          | a bit (++)               | a lot (+++)                         |                          |
| does improving this____ affects                                                               |                          |                          |                                     |                          |
| 1. Proximity to public transport like bus stop                                                | <input type="checkbox"/> | <input type="checkbox"/> | <input checked="" type="checkbox"/> | <input type="checkbox"/> |
| 2. Proximity to greenery like public parks, gardens                                           | <input type="checkbox"/> | <input type="checkbox"/> | <input type="checkbox"/>            | <input type="checkbox"/> |
| 3. Access to community spaces where you can gather with your neighbours and friends/relatives | <input type="checkbox"/> | <input type="checkbox"/> | <input type="checkbox"/>            | <input type="checkbox"/> |
| 4. Cleanliness of streets                                                                     | <input type="checkbox"/> | <input type="checkbox"/> | <input type="checkbox"/>            | <input type="checkbox"/> |
| 5. A feeling of belonging to the neighbourhood                                                | <input type="checkbox"/> | <input type="checkbox"/> | <input type="checkbox"/>            | <input type="checkbox"/> |
| 6. A good relationship with neighbours and community                                          | <input type="checkbox"/> | <input type="checkbox"/> | <input type="checkbox"/>            | <input type="checkbox"/> |
| 7. Proximity to employment opportunities                                                      | <input type="checkbox"/> | <input type="checkbox"/> | <input type="checkbox"/>            | <input type="checkbox"/> |
| 8. Proximity to primary & secondary schools                                                   | <input type="checkbox"/> | <input type="checkbox"/> | <input type="checkbox"/>            | <input type="checkbox"/> |
| 9. Proximity to healthcare facilities                                                         | <input type="checkbox"/> | <input type="checkbox"/> | <input type="checkbox"/>            | <input type="checkbox"/> |
| 10. Sense of safety and security                                                              | <input type="checkbox"/> | <input type="checkbox"/> | <input type="checkbox"/>            | <input type="checkbox"/> |

## Supplementary 6-Ratings from Interviewee 2 Neighbourhood 2

|                                                                                                                                                                                                              | not at all                          | a bit                               | a lot                               |
|--------------------------------------------------------------------------------------------------------------------------------------------------------------------------------------------------------------|-------------------------------------|-------------------------------------|-------------------------------------|
| 1 How much do you like your neighbourhood?<br>आप अपने गली-महल्ले को कितना पसंद करते हैं?                                                                                                                     | <input type="checkbox"/>            | <input checked="" type="checkbox"/> | <input type="checkbox"/>            |
| 2 How would you rate the following in your neighbourhood?<br>आप अपने गली-महल्ले में इन चीजों को कैसे रेट करेंगे? संतुष्ट                                                                                     | बिल्कुल नहीं,<br>bad                | , थोड़ा सा<br>okay                  | बहुत ज्यादा<br>good                 |
| Access to basic amenities like household level tap water, electricity, toilet/sewerage<br>घर में नलके का पानी, बिजली, लेट्रिन/ गंदे पानी की नाली ,                                                           | <input type="checkbox"/>            | <input type="checkbox"/>            | <input checked="" type="checkbox"/> |
| Quality of housing structure घर की बनावट की हालत                                                                                                                                                             | <input type="checkbox"/>            | <input type="checkbox"/>            | <input checked="" type="checkbox"/> |
| Proximity to public transport like bus stop, बस स्टॉप से नज़दीकी                                                                                                                                             | <input type="checkbox"/>            | <input checked="" type="checkbox"/> | <input type="checkbox"/>            |
| Proximity to greenery like public parks, gardens पार्क, बगीचे से नज़दीकी                                                                                                                                     | <input checked="" type="checkbox"/> | <input type="checkbox"/>            | <input type="checkbox"/>            |
| Access to community spaces where you can gather with your neighbours and friends/relatives<br>महल्ले में ऐसी सामुदायिक जगहों तक पहुँच जहाँ आप अपने पड़ोसियों, रिश्तेदारों और दोस्तों से बात और मुलाकात करें? | <input checked="" type="checkbox"/> | <input type="checkbox"/>            | <input type="checkbox"/>            |
| Cleanliness of streets/neighbourhood (महल्ले की साफ-सफाई)                                                                                                                                                    | <input type="checkbox"/>            | <input type="checkbox"/>            | <input checked="" type="checkbox"/> |
| A feeling of belonging to the neighbourhood (महल्ले अपनेपन की भावना)                                                                                                                                         | <input type="checkbox"/>            | <input type="checkbox"/>            | <input checked="" type="checkbox"/> |
| A good relationship with neighbours and community (पड़ोसियों और समाज के लोगों से अच्छे सम्बन्ध )                                                                                                             | <input type="checkbox"/>            | <input type="checkbox"/>            | <input checked="" type="checkbox"/> |
| Proximity to employment opportunities (रोज़गार/नौकरी के अवसरों से नज़दीकी)                                                                                                                                   | <input checked="" type="checkbox"/> | <input type="checkbox"/>            | <input type="checkbox"/>            |
| Proximity to primary & secondary schools प्राथमिक और माध्यमिक स्कूलों से नज़दीकी और पहुँच                                                                                                                    | <input type="checkbox"/>            | <input checked="" type="checkbox"/> | <input type="checkbox"/>            |
| Proximity to healthcare facilities अस्पताल से नज़दीकी और पहुँच                                                                                                                                               | <input type="checkbox"/>            | <input checked="" type="checkbox"/> | <input type="checkbox"/>            |
| Sense of safety and security सुरक्षा और सलामती की भावना                                                                                                                                                      | <input type="checkbox"/>            | <input type="checkbox"/>            | <input checked="" type="checkbox"/> |
| Security of tenure घर/मकान में रहने की सुरक्षा( निकाले जाने के डर से)                                                                                                                                        | <input type="checkbox"/>            | <input type="checkbox"/>            | <input checked="" type="checkbox"/> |
| Safety from natural and manmade hazards प्राकृतिक आपदा flood                                                                                                                                                 | <input type="checkbox"/>            | <input type="checkbox"/>            | <input checked="" type="checkbox"/> |

| Of the following, what do you think improves में सुधार                                        | thoda                               | lagbhag                  | bahut jyada                         | bikul na                 |
|-----------------------------------------------------------------------------------------------|-------------------------------------|--------------------------|-------------------------------------|--------------------------|
| Proximity to greenery like public parks, gardens पार्क, बगीचे से नज़दीकी                      | very little (+)                     | a bit (++)               | a lot (+++)                         |                          |
| does improving this____ affects                                                               |                                     |                          |                                     |                          |
| 1. Proximity to public transport like bus stop                                                | <input type="checkbox"/>            | <input type="checkbox"/> | <input checked="" type="checkbox"/> | <input type="checkbox"/> |
| 2. Proximity to greenery like public parks, gardens                                           | <input type="checkbox"/>            | <input type="checkbox"/> | <input type="checkbox"/>            | <input type="checkbox"/> |
| 3. Access to community spaces where you can gather with your neighbours and friends/relatives | <input checked="" type="checkbox"/> | <input type="checkbox"/> | <input type="checkbox"/>            | <input type="checkbox"/> |
| 4. Cleanliness of streets                                                                     | <input type="checkbox"/>            | <input type="checkbox"/> | <input type="checkbox"/>            | <input type="checkbox"/> |
| 5. A feeling of belonging to the neighbourhood                                                | <input type="checkbox"/>            | <input type="checkbox"/> | <input type="checkbox"/>            | <input type="checkbox"/> |
| 6. A good relationship with neighbours and community                                          | <input type="checkbox"/>            | <input type="checkbox"/> | <input type="checkbox"/>            | <input type="checkbox"/> |
| 7. Proximity to employment opportunities                                                      | <input type="checkbox"/>            | <input type="checkbox"/> | <input type="checkbox"/>            | <input type="checkbox"/> |
| 8. Proximity to primary & secondary schools                                                   | <input type="checkbox"/>            | <input type="checkbox"/> | <input type="checkbox"/>            | <input type="checkbox"/> |
| 9. Proximity to healthcare facilities                                                         | <input type="checkbox"/>            | <input type="checkbox"/> | <input type="checkbox"/>            | <input type="checkbox"/> |
| 10. Sense of safety and security                                                              |                                     |                          |                                     |                          |

| Of the following, what do you think improves में सुधार                                                                                                                                          | thoda                    | lagbhag                  | bahut jyada                         | bikul na                 |
|-------------------------------------------------------------------------------------------------------------------------------------------------------------------------------------------------|--------------------------|--------------------------|-------------------------------------|--------------------------|
| Access to community spaces where you can gather with your neighbours and friends/relatives महल्ले में ऐसी जगहों तक पहुँच जहाँ आप अपने पड़ोसियों, रिश्तेदारों और दोस्तों से बात और मुलाकात करें? | very little (+)          | a bit (++)               | a lot (+++)                         |                          |
| does improving this____ affects                                                                                                                                                                 |                          |                          |                                     |                          |
| 1. Proximity to public transport like bus stop                                                                                                                                                  | <input type="checkbox"/> | <input type="checkbox"/> | <input type="checkbox"/>            | <input type="checkbox"/> |
| 2. Proximity to greenery like public parks, gardens                                                                                                                                             | <input type="checkbox"/> | <input type="checkbox"/> | <input checked="" type="checkbox"/> | <input type="checkbox"/> |
| 3. Access to community spaces where you can gather with your neighbours and friends/relatives                                                                                                   | <input type="checkbox"/> | <input type="checkbox"/> | <input type="checkbox"/>            | <input type="checkbox"/> |
| 4. Cleanliness of streets                                                                                                                                                                       | <input type="checkbox"/> | <input type="checkbox"/> | <input checked="" type="checkbox"/> | <input type="checkbox"/> |
| 5. A feeling of belonging to the neighbourhood                                                                                                                                                  | <input type="checkbox"/> | <input type="checkbox"/> | <input type="checkbox"/>            | <input type="checkbox"/> |
| 6. A good relationship with neighbours and community                                                                                                                                            | <input type="checkbox"/> | <input type="checkbox"/> | <input type="checkbox"/>            | <input type="checkbox"/> |
| 7. Proximity to employment opportunities                                                                                                                                                        | <input type="checkbox"/> | <input type="checkbox"/> | <input type="checkbox"/>            | <input type="checkbox"/> |
| 8. Proximity to primary & secondary schools                                                                                                                                                     | <input type="checkbox"/> | <input type="checkbox"/> | <input type="checkbox"/>            | <input type="checkbox"/> |
| 9. Proximity to healthcare facilities                                                                                                                                                           | <input type="checkbox"/> | <input type="checkbox"/> | <input type="checkbox"/>            | <input type="checkbox"/> |
| 10. Sense of safety and security                                                                                                                                                                |                          |                          |                                     |                          |

| Of the following, what do you think improves में सुधार                                        | thoda                    | lagbhag                  | bahut jyada                         | bikul na                 |
|-----------------------------------------------------------------------------------------------|--------------------------|--------------------------|-------------------------------------|--------------------------|
| Proximity to employment opportunities (रोज़गार/नौकरी के अवसरों से नज़दीकी)                    | very little (+)          | a bit (++)               | a lot (+++)                         |                          |
| does improving this____ affects                                                               |                          |                          |                                     |                          |
| 1. Proximity to public transport like bus stop                                                | <input type="checkbox"/> | <input type="checkbox"/> | <input checked="" type="checkbox"/> | <input type="checkbox"/> |
| 2. Proximity to greenery like public parks, gardens                                           | <input type="checkbox"/> | <input type="checkbox"/> | <input type="checkbox"/>            | <input type="checkbox"/> |
| 3. Access to community spaces where you can gather with your neighbours and friends/relatives | <input type="checkbox"/> | <input type="checkbox"/> | <input checked="" type="checkbox"/> | <input type="checkbox"/> |
| 4. Cleanliness of streets                                                                     | <input type="checkbox"/> | <input type="checkbox"/> | <input type="checkbox"/>            | <input type="checkbox"/> |
| 5. A feeling of belonging to the neighbourhood                                                | <input type="checkbox"/> | <input type="checkbox"/> | <input type="checkbox"/>            | <input type="checkbox"/> |
| 6. A good relationship with neighbours and community                                          | <input type="checkbox"/> | <input type="checkbox"/> | <input type="checkbox"/>            | <input type="checkbox"/> |
| 7. Proximity to employment opportunities                                                      | <input type="checkbox"/> | <input type="checkbox"/> | <input type="checkbox"/>            | <input type="checkbox"/> |
| 8. Proximity to primary & secondary schools                                                   | <input type="checkbox"/> | <input type="checkbox"/> | <input type="checkbox"/>            | <input type="checkbox"/> |
| 9. Proximity to healthcare facilities                                                         | <input type="checkbox"/> | <input type="checkbox"/> | <input type="checkbox"/>            | <input type="checkbox"/> |
| 10. Sense of safety and security                                                              |                          |                          |                                     |                          |



## Supplementary 7-Ratings from Interviewee 3 Neighbourhood 2

|                                                                                                                                                                                                               | not at all               | a bit                               | a lot                               |
|---------------------------------------------------------------------------------------------------------------------------------------------------------------------------------------------------------------|--------------------------|-------------------------------------|-------------------------------------|
| 1 How much do you like your neighbourhood?<br>आप अपने गली- मुहल्ले को कितना पसंद करते हैं?                                                                                                                    | <input type="checkbox"/> | <input type="checkbox"/>            | <input checked="" type="checkbox"/> |
| 2 How would you rate the following in your neighbourhood?<br>आप अपने गली-मुहल्ले में इन चीजों को कैसे रेट करेंगे? संतुष्ट                                                                                     | बिल्कुल नहीं,<br>bad     | , थोड़ा सा<br>okay                  | बहुत ज्यादा<br>good                 |
| Access to basic amenities like household level tap water, electricity, toilet/sewerage<br>घर में नलके का पानी, बिजली, लेट्रिन/ गंदे पानी की नाली ,                                                            | <input type="checkbox"/> | <input type="checkbox"/>            | <input checked="" type="checkbox"/> |
| Quality of housing structure घर की बनावट की हालत                                                                                                                                                              | <input type="checkbox"/> | <input type="checkbox"/>            | <input checked="" type="checkbox"/> |
| Proximity to public transport like bus stop, बस स्टॉप से नज़दीकी                                                                                                                                              | <input type="checkbox"/> | <input checked="" type="checkbox"/> | <input type="checkbox"/>            |
| Proximity to greenery like public parks, gardens पार्क, बगीचे से नज़दीकी                                                                                                                                      | <input type="checkbox"/> | <input type="checkbox"/>            | <input checked="" type="checkbox"/> |
| Access to community spaces where you can gather with your neighbours and friends/relatives<br>मुहल्ले में ऐसी सामुदायिक जगहों तक पहुँच जहाँ आप अपने पड़ोसियों, रिश्तेदारों और दोस्तों से बात और मुलाकात करें? | <input type="checkbox"/> | <input type="checkbox"/>            | <input checked="" type="checkbox"/> |
| Cleanliness of streets/neighbourhood (मुहल्ले की साफ़-सफाई)                                                                                                                                                   | <input type="checkbox"/> | <input type="checkbox"/>            | <input checked="" type="checkbox"/> |
| A feeling of belonging to the neighbourhood (मुहल्ले अपनेपन की भावना)                                                                                                                                         | <input type="checkbox"/> | <input type="checkbox"/>            | <input checked="" type="checkbox"/> |
| A good relationship with neighbours and community (पड़ोसियों और समाज के लोगों से अच्छे सम्बन्ध )                                                                                                              | <input type="checkbox"/> | <input type="checkbox"/>            | <input checked="" type="checkbox"/> |
| Proximity to employment opportunities (रोज़गार/नौकरी के अवसरों से नज़दीकी)                                                                                                                                    | <input type="checkbox"/> | <input checked="" type="checkbox"/> | <input type="checkbox"/>            |
| Proximity to primary & secondary schools प्राथमिक और माध्यमिक स्कूलों से नज़दीकी और पहुँच                                                                                                                     | <input type="checkbox"/> | <input type="checkbox"/>            | <input checked="" type="checkbox"/> |
| Proximity to healthcare facilities अस्पताल से नज़दीकी और पहुँच                                                                                                                                                | <input type="checkbox"/> | <input type="checkbox"/>            | <input checked="" type="checkbox"/> |
| Sense of safety and security सुरक्षा और सलामती की भावना                                                                                                                                                       | <input type="checkbox"/> | <input type="checkbox"/>            | <input checked="" type="checkbox"/> |
| Security of tenure घर/मकान में रहने की सुरक्षा( निकाले जाने के डर से)                                                                                                                                         | <input type="checkbox"/> | <input type="checkbox"/>            | <input checked="" type="checkbox"/> |
| Safety from natural and manmade hazards प्राकृतिक आपदा flood                                                                                                                                                  | <input type="checkbox"/> | <input type="checkbox"/>            | <input checked="" type="checkbox"/> |

| Of the following, what do you think improves में सुधार                                        | thoda                    | lagbhag                  | bahut jyada              | bikul na                            |
|-----------------------------------------------------------------------------------------------|--------------------------|--------------------------|--------------------------|-------------------------------------|
| Proximity to public transport like bus stop, बस स्टॉप से नज़दीकी                              | very little (+)          | a bit (++)               | a lot (+++)              |                                     |
| does improving this___ affects                                                                |                          |                          |                          |                                     |
| 1. Proximity to public transport like bus stop                                                | <input type="checkbox"/> | <input type="checkbox"/> | <input type="checkbox"/> | <input checked="" type="checkbox"/> |
| 2. Proximity to greenery like public parks, gardens                                           | <input type="checkbox"/> | <input type="checkbox"/> | <input type="checkbox"/> | <input checked="" type="checkbox"/> |
| 3. Access to community spaces where you can gather with your neighbours and friends/relatives | <input type="checkbox"/> | <input type="checkbox"/> | <input type="checkbox"/> | <input checked="" type="checkbox"/> |
| 4. Cleanliness of streets                                                                     | <input type="checkbox"/> | <input type="checkbox"/> | <input type="checkbox"/> | <input checked="" type="checkbox"/> |
| 5. A feeling of belonging to the neighbourhood                                                | <input type="checkbox"/> | <input type="checkbox"/> | <input type="checkbox"/> | <input checked="" type="checkbox"/> |
| 6. A good relationship with neighbours and community                                          | <input type="checkbox"/> | <input type="checkbox"/> | <input type="checkbox"/> | <input checked="" type="checkbox"/> |
| 7. Proximity to employment opportunities                                                      | <input type="checkbox"/> | <input type="checkbox"/> | <input type="checkbox"/> | <input checked="" type="checkbox"/> |
| 8. Proximity to primary & secondary schools                                                   | <input type="checkbox"/> | <input type="checkbox"/> | <input type="checkbox"/> | <input checked="" type="checkbox"/> |
| 9. Proximity to healthcare facilities                                                         | <input type="checkbox"/> | <input type="checkbox"/> | <input type="checkbox"/> | <input checked="" type="checkbox"/> |
| 10. Sense of safety and security                                                              | <input type="checkbox"/> | <input type="checkbox"/> | <input type="checkbox"/> | <input checked="" type="checkbox"/> |

| Of the following, what do you think improves में सुधार                                        | thoda                    | lagbhag                             | bahut jyada                         | bikul na                 |
|-----------------------------------------------------------------------------------------------|--------------------------|-------------------------------------|-------------------------------------|--------------------------|
| Proximity to employment opportunities (रोज़गार/नौकरी के अवसरों से नज़दीकी)                    | very little (+)          | a bit (++)                          | a lot (+++)                         |                          |
| does improving this___ affects                                                                |                          |                                     |                                     |                          |
| 1. Proximity to public transport like bus stop                                                | <input type="checkbox"/> | <input type="checkbox"/>            | <input checked="" type="checkbox"/> | <input type="checkbox"/> |
| 2. Proximity to greenery like public parks, gardens                                           | <input type="checkbox"/> | <input type="checkbox"/>            | <input type="checkbox"/>            | <input type="checkbox"/> |
| 3. Access to community spaces where you can gather with your neighbours and friends/relatives | <input type="checkbox"/> | <input checked="" type="checkbox"/> | <input type="checkbox"/>            | <input type="checkbox"/> |
| 4. Cleanliness of streets                                                                     | <input type="checkbox"/> | <input type="checkbox"/>            | <input type="checkbox"/>            | <input type="checkbox"/> |
| 5. A feeling of belonging to the neighbourhood                                                | <input type="checkbox"/> | <input type="checkbox"/>            | <input type="checkbox"/>            | <input type="checkbox"/> |
| 6. A good relationship with neighbours and community                                          | <input type="checkbox"/> | <input type="checkbox"/>            | <input type="checkbox"/>            | <input type="checkbox"/> |
| 7. Proximity to employment opportunities                                                      | <input type="checkbox"/> | <input type="checkbox"/>            | <input type="checkbox"/>            | <input type="checkbox"/> |
| 8. Proximity to primary & secondary schools                                                   | <input type="checkbox"/> | <input type="checkbox"/>            | <input type="checkbox"/>            | <input type="checkbox"/> |
| 9. Proximity to healthcare facilities                                                         | <input type="checkbox"/> | <input type="checkbox"/>            | <input type="checkbox"/>            | <input type="checkbox"/> |
| 10. Sense of safety and security                                                              | <input type="checkbox"/> | <input type="checkbox"/>            | <input type="checkbox"/>            | <input type="checkbox"/> |

## Supplementary 8-Ratings from Interviewee 1 Neighbourhood 3

|                                                                                                                                                                                                              | not at all                          | a bit                               | a lot                               |
|--------------------------------------------------------------------------------------------------------------------------------------------------------------------------------------------------------------|-------------------------------------|-------------------------------------|-------------------------------------|
| 1 How much do you like your neighbourhood?<br>आप अपने गली-महल्ले को कितना पसंद करते हैं?                                                                                                                     | <input type="checkbox"/>            | <input checked="" type="checkbox"/> | <input type="checkbox"/>            |
| 2 How would you rate the following in your neighbourhood?<br>आप अपने गली-महल्ले में इन चीजों को कैसे रेट करेंगे? संतुष्ट                                                                                     | बिल्कुल नहीं,<br>bad                | , थोड़ा सा<br>okay                  | बहुत ज्यादा<br>good                 |
| Access to basic amenities like household level tap water, electricity, toilet/sewerage<br>घर में नलके का पानी, बिजली, टैटिन/ गंदे पानी की नाली ,                                                             | <input type="checkbox"/>            | <input type="checkbox"/>            | <input checked="" type="checkbox"/> |
| Quality of housing structure घर की बनावट की हालत                                                                                                                                                             | <input type="checkbox"/>            | <input type="checkbox"/>            | <input checked="" type="checkbox"/> |
| Proximity to public transport like bus stop, बस स्टॉप से नज़दीकी                                                                                                                                             | <input type="checkbox"/>            | <input type="checkbox"/>            | <input checked="" type="checkbox"/> |
| Proximity to greenery like public parks, gardens पार्क, बगीचे से नज़दीकी                                                                                                                                     | <input checked="" type="checkbox"/> | <input type="checkbox"/>            | <input type="checkbox"/>            |
| Access to community spaces where you can gather with your neighbours and friends/relatives<br>महल्ले में ऐसी सामुदायिक जगहों तक पहुँच जहाँ आप अपने पड़ोसियों, रिश्तेदारों और दोस्तों से बात और मुलाकात करें? | <input checked="" type="checkbox"/> | <input type="checkbox"/>            | <input type="checkbox"/>            |
| Cleanliness of streets/neighbourhood (महल्ले की साफ़-सफाई)                                                                                                                                                   | <input type="checkbox"/>            | <input type="checkbox"/>            | <input checked="" type="checkbox"/> |
| A feeling of belonging to the neighbourhood (मुहल्ले अपनेपन की भावना)                                                                                                                                        | <input type="checkbox"/>            | <input type="checkbox"/>            | <input checked="" type="checkbox"/> |
| A good relationship with neighbours and community (पड़ोसियों और समाज के लोगों से अच्छे सम्बन्ध )                                                                                                             | <input type="checkbox"/>            | <input type="checkbox"/>            | <input checked="" type="checkbox"/> |
| Proximity to employment opportunities (रोज़गार/नौकरी के अवसरों से नज़दीकी)                                                                                                                                   | <input checked="" type="checkbox"/> | <input type="checkbox"/>            | <input type="checkbox"/>            |
| Proximity to primary & secondary schools प्राथमिक और माध्यमिक स्कूलों से नज़दीकी और पहुँच                                                                                                                    | <input type="checkbox"/>            | <input type="checkbox"/>            | <input checked="" type="checkbox"/> |
| Proximity to healthcare facilities अस्पताल से नज़दीकी और पहुँच                                                                                                                                               | <input type="checkbox"/>            | <input type="checkbox"/>            | <input checked="" type="checkbox"/> |
| Sense of safety and security सुरक्षा और सलामती की भावना                                                                                                                                                      | <input type="checkbox"/>            | <input type="checkbox"/>            | <input checked="" type="checkbox"/> |
| Security of tenure घर/मकान में रहने की सुरक्षा( निकाले जाने के डर से)                                                                                                                                        | <input type="checkbox"/>            | <input type="checkbox"/>            | <input checked="" type="checkbox"/> |
| Safety from natural and manmade hazards प्राकृतिक आपदा flood                                                                                                                                                 | <input type="checkbox"/>            | <input type="checkbox"/>            | <input checked="" type="checkbox"/> |

| Of the following, what do you think improves में सुधार                                        | thoda                               | lagbhag                  | bahut jyada                         | bikul na                 |
|-----------------------------------------------------------------------------------------------|-------------------------------------|--------------------------|-------------------------------------|--------------------------|
| Proximity to greenery like public parks, gardens पार्क, बगीचे से नज़दीकी                      | very little (+)                     | a bit (++)               | a lot (+++)                         |                          |
| does improving this___ affects                                                                |                                     |                          |                                     |                          |
| 1. Proximity to public transport like bus stop                                                | <input type="checkbox"/>            | <input type="checkbox"/> | <input checked="" type="checkbox"/> | <input type="checkbox"/> |
| 2. Proximity to greenery like public parks, gardens                                           | <input type="checkbox"/>            | <input type="checkbox"/> | <input type="checkbox"/>            | <input type="checkbox"/> |
| 3. Access to community spaces where you can gather with your neighbours and friends/relatives | <input checked="" type="checkbox"/> | <input type="checkbox"/> | <input type="checkbox"/>            | <input type="checkbox"/> |
| 4. Cleanliness of streets                                                                     | <input type="checkbox"/>            | <input type="checkbox"/> | <input type="checkbox"/>            | <input type="checkbox"/> |
| 5. A feeling of belonging to the neighbourhood                                                | <input type="checkbox"/>            | <input type="checkbox"/> | <input type="checkbox"/>            | <input type="checkbox"/> |
| 6. A good relationship with neighbours and community                                          | <input type="checkbox"/>            | <input type="checkbox"/> | <input type="checkbox"/>            | <input type="checkbox"/> |
| 7. Proximity to employment opportunities                                                      | <input type="checkbox"/>            | <input type="checkbox"/> | <input type="checkbox"/>            | <input type="checkbox"/> |
| 8. Proximity to primary & secondary schools                                                   | <input type="checkbox"/>            | <input type="checkbox"/> | <input type="checkbox"/>            | <input type="checkbox"/> |
| 9. Proximity to healthcare facilities                                                         | <input type="checkbox"/>            | <input type="checkbox"/> | <input type="checkbox"/>            | <input type="checkbox"/> |
| 10. Sense of safety and security                                                              |                                     |                          |                                     |                          |

| Of the following, what do you think improves में सुधार                                                        | thoda                    | lagbhag                  | bahut jyada                         | bikul na                 |
|---------------------------------------------------------------------------------------------------------------|--------------------------|--------------------------|-------------------------------------|--------------------------|
| Access to community spaces where you can gather with your neighbours and friends/relatives मुहल्ले में ऐसी सा | very little (+)          | a bit (++)               | a lot (+++)                         |                          |
| does improving this___ affects                                                                                |                          |                          |                                     |                          |
| 1. Proximity to public transport like bus stop                                                                | <input type="checkbox"/> | <input type="checkbox"/> | <input type="checkbox"/>            | <input type="checkbox"/> |
| 2. Proximity to greenery like public parks, gardens                                                           | <input type="checkbox"/> | <input type="checkbox"/> | <input checked="" type="checkbox"/> | <input type="checkbox"/> |
| 3. Access to community spaces where you can gather with your neighbours and friends/relatives                 | <input type="checkbox"/> | <input type="checkbox"/> | <input type="checkbox"/>            | <input type="checkbox"/> |
| 4. Cleanliness of streets                                                                                     | <input type="checkbox"/> | <input type="checkbox"/> | <input checked="" type="checkbox"/> | <input type="checkbox"/> |
| 5. A feeling of belonging to the neighbourhood                                                                | <input type="checkbox"/> | <input type="checkbox"/> | <input type="checkbox"/>            | <input type="checkbox"/> |
| 6. A good relationship with neighbours and community                                                          | <input type="checkbox"/> | <input type="checkbox"/> | <input type="checkbox"/>            | <input type="checkbox"/> |
| 7. Proximity to employment opportunities                                                                      | <input type="checkbox"/> | <input type="checkbox"/> | <input type="checkbox"/>            | <input type="checkbox"/> |
| 8. Proximity to primary & secondary schools                                                                   | <input type="checkbox"/> | <input type="checkbox"/> | <input type="checkbox"/>            | <input type="checkbox"/> |
| 9. Proximity to healthcare facilities                                                                         | <input type="checkbox"/> | <input type="checkbox"/> | <input type="checkbox"/>            | <input type="checkbox"/> |
| 10. Sense of safety and security                                                                              |                          |                          |                                     |                          |

| Of the following, what do you think improves में सुधार                                        | thoda                    | lagbhag                  | bahut jyada                         | bikul na                 |
|-----------------------------------------------------------------------------------------------|--------------------------|--------------------------|-------------------------------------|--------------------------|
| Proximity to employment opportunities (रोज़गार/नौकरी के अवसरों से नज़दीकी)                    | very little (+)          | a bit (++)               | a lot (+++)                         |                          |
| does improving this___ affects                                                                |                          |                          |                                     |                          |
| 1. Proximity to public transport like bus stop                                                | <input type="checkbox"/> | <input type="checkbox"/> | <input checked="" type="checkbox"/> | <input type="checkbox"/> |
| 2. Proximity to greenery like public parks, gardens                                           | <input type="checkbox"/> | <input type="checkbox"/> | <input type="checkbox"/>            | <input type="checkbox"/> |
| 3. Access to community spaces where you can gather with your neighbours and friends/relatives | <input type="checkbox"/> | <input type="checkbox"/> | <input checked="" type="checkbox"/> | <input type="checkbox"/> |
| 4. Cleanliness of streets                                                                     | <input type="checkbox"/> | <input type="checkbox"/> | <input type="checkbox"/>            | <input type="checkbox"/> |
| 5. A feeling of belonging to the neighbourhood                                                | <input type="checkbox"/> | <input type="checkbox"/> | <input type="checkbox"/>            | <input type="checkbox"/> |
| 6. A good relationship with neighbours and community                                          | <input type="checkbox"/> | <input type="checkbox"/> | <input type="checkbox"/>            | <input type="checkbox"/> |
| 7. Proximity to employment opportunities                                                      | <input type="checkbox"/> | <input type="checkbox"/> | <input type="checkbox"/>            | <input type="checkbox"/> |
| 8. Proximity to primary & secondary schools                                                   | <input type="checkbox"/> | <input type="checkbox"/> | <input type="checkbox"/>            | <input type="checkbox"/> |
| 9. Proximity to healthcare facilities                                                         | <input type="checkbox"/> | <input type="checkbox"/> | <input type="checkbox"/>            | <input type="checkbox"/> |
| 10. Sense of safety and security                                                              |                          |                          |                                     |                          |



### Supplementary 9-Ratings from Interviewee 2 Neighbourhood 3

|                                                                                                                                                                                                              | not at all                          | a bit                               | a lot                               |
|--------------------------------------------------------------------------------------------------------------------------------------------------------------------------------------------------------------|-------------------------------------|-------------------------------------|-------------------------------------|
| 1 How much do you like your neighbourhood?<br>आप अपने गली-महल्ले को कितना पसंद करते हैं?                                                                                                                     | <input type="checkbox"/>            | <input type="checkbox"/>            | <input checked="" type="checkbox"/> |
| 2 How would you rate the following in your neighbourhood?<br>आप अपने गली-महल्ले में इन चीजों को कैसे रेट करेंगे? संतुष्ट                                                                                     | बिल्कुल नहीं,<br>bad                | , थोड़ा सा<br>okay                  | बहुत ज्यादा<br>good                 |
| Access to basic amenities like household level tap water, electricity, toilet/sewerage<br>घर में नलके का पानी, बिजली, लैट्रिन/गंदे पानी की नाली,                                                             | <input type="checkbox"/>            | <input type="checkbox"/>            | <input checked="" type="checkbox"/> |
| Quality of housing structure घर की बनावट की हालत                                                                                                                                                             | <input type="checkbox"/>            | <input type="checkbox"/>            | <input checked="" type="checkbox"/> |
| Proximity to public transport like bus stop, बस स्टॉप से नज़दीकी                                                                                                                                             | <input type="checkbox"/>            | <input checked="" type="checkbox"/> | <input type="checkbox"/>            |
| Proximity to greenery like public parks, gardens पार्क, बगीचे से नज़दीकी                                                                                                                                     | <input checked="" type="checkbox"/> | <input type="checkbox"/>            | <input type="checkbox"/>            |
| Access to community spaces where you can gather with your neighbours and friends/relatives<br>महल्ले में ऐसी सामुदायिक जगहों तक पहुँच जहाँ आप अपने पड़ोसियों, रिश्तेदारों और दोस्तों से बात और मुलाकात करें? | <input checked="" type="checkbox"/> | <input type="checkbox"/>            | <input type="checkbox"/>            |
| Cleanliness of streets/neighbourhood (महल्ले की साफ़-सफाई)                                                                                                                                                   | <input type="checkbox"/>            | <input checked="" type="checkbox"/> | <input type="checkbox"/>            |
| A feeling of belonging to the neighbourhood (महल्ले अपनेपन की भावना)                                                                                                                                         | <input type="checkbox"/>            | <input type="checkbox"/>            | <input checked="" type="checkbox"/> |
| A good relationship with neighbours and community (पड़ोसियों और समाज के लोगों से अच्छे सम्बन्ध)                                                                                                              | <input type="checkbox"/>            | <input type="checkbox"/>            | <input checked="" type="checkbox"/> |
| Proximity to employment opportunities (रोज़गार/नौकरी के अवसरों से नज़दीकी)                                                                                                                                   | <input checked="" type="checkbox"/> | <input type="checkbox"/>            | <input type="checkbox"/>            |
| Proximity to primary & secondary schools प्राथमिक और माध्यमिक स्कूलों से नज़दीकी और पहुँच                                                                                                                    | <input type="checkbox"/>            | <input type="checkbox"/>            | <input checked="" type="checkbox"/> |
| Proximity to healthcare facilities अस्पताल से नज़दीकी और पहुँच                                                                                                                                               | <input checked="" type="checkbox"/> | <input type="checkbox"/>            | <input type="checkbox"/>            |
| Sense of safety and security सुरक्षा और सलामती की भावना                                                                                                                                                      | <input type="checkbox"/>            | <input type="checkbox"/>            | <input checked="" type="checkbox"/> |
| Security of tenure घर/मकान में रहने की सुरक्षा( निकाले जाने के डर से)                                                                                                                                        | <input type="checkbox"/>            | <input type="checkbox"/>            | <input checked="" type="checkbox"/> |
| Safety from natural and manmade hazards प्राकृतिक आपदा flood                                                                                                                                                 | <input type="checkbox"/>            | <input type="checkbox"/>            | <input checked="" type="checkbox"/> |

| Of the following, what do you think improves में सुधार                                        | thoda                    | lagbhag                  | bahut jyada                         | bikul na                 |
|-----------------------------------------------------------------------------------------------|--------------------------|--------------------------|-------------------------------------|--------------------------|
| Proximity to public transport like bus stop, बस स्टॉप से नज़दीकी                              | very little (+)          | a bit (++)               | a lot (+++)                         |                          |
| does improving this___ affects                                                                |                          |                          |                                     |                          |
| 1. Proximity to public transport like bus stop                                                | <input type="checkbox"/> | <input type="checkbox"/> | <input type="checkbox"/>            | <input type="checkbox"/> |
| 2. Proximity to greenery like public parks, gardens                                           | <input type="checkbox"/> | <input type="checkbox"/> | <input type="checkbox"/>            | <input type="checkbox"/> |
| 3. Access to community spaces where you can gather with your neighbours and friends/relatives | <input type="checkbox"/> | <input type="checkbox"/> | <input type="checkbox"/>            | <input type="checkbox"/> |
| 4. Cleanliness of streets                                                                     | <input type="checkbox"/> | <input type="checkbox"/> | <input type="checkbox"/>            | <input type="checkbox"/> |
| 5. A feeling of belonging to the neighbourhood                                                | <input type="checkbox"/> | <input type="checkbox"/> | <input type="checkbox"/>            | <input type="checkbox"/> |
| 6. A good relationship with neighbours and community                                          | <input type="checkbox"/> | <input type="checkbox"/> | <input checked="" type="checkbox"/> | <input type="checkbox"/> |
| 7. Proximity to employment opportunities                                                      | <input type="checkbox"/> | <input type="checkbox"/> | <input type="checkbox"/>            | <input type="checkbox"/> |
| 8. Proximity to primary & secondary schools                                                   | <input type="checkbox"/> | <input type="checkbox"/> | <input type="checkbox"/>            | <input type="checkbox"/> |
| 9. Proximity to healthcare facilities                                                         | <input type="checkbox"/> | <input type="checkbox"/> | <input type="checkbox"/>            | <input type="checkbox"/> |
| 10. Sense of safety and security                                                              | <input type="checkbox"/> | <input type="checkbox"/> | <input type="checkbox"/>            | <input type="checkbox"/> |

| Of the following, what do you think improves में सुधार                                        | thoda                    | lagbhag                             | bahut jyada                         | bikul na                 |
|-----------------------------------------------------------------------------------------------|--------------------------|-------------------------------------|-------------------------------------|--------------------------|
| Proximity to greenery like public parks, gardens पार्क, बगीचे से नज़दीकी                      | very little (+)          | a bit (++)                          | a lot (+++)                         |                          |
| does improving this___ affects                                                                |                          |                                     |                                     |                          |
| 1. Proximity to public transport like bus stop                                                | <input type="checkbox"/> | <input checked="" type="checkbox"/> | <input type="checkbox"/>            | <input type="checkbox"/> |
| 2. Proximity to greenery like public parks, gardens                                           | <input type="checkbox"/> | <input type="checkbox"/>            | <input type="checkbox"/>            | <input type="checkbox"/> |
| 3. Access to community spaces where you can gather with your neighbours and friends/relatives | <input type="checkbox"/> | <input type="checkbox"/>            | <input checked="" type="checkbox"/> | <input type="checkbox"/> |
| 4. Cleanliness of streets                                                                     | <input type="checkbox"/> | <input type="checkbox"/>            | <input checked="" type="checkbox"/> | <input type="checkbox"/> |
| 5. A feeling of belonging to the neighbourhood                                                | <input type="checkbox"/> | <input type="checkbox"/>            | <input checked="" type="checkbox"/> | <input type="checkbox"/> |
| 6. A good relationship with neighbours and community                                          | <input type="checkbox"/> | <input type="checkbox"/>            | <input checked="" type="checkbox"/> | <input type="checkbox"/> |
| 7. Proximity to employment opportunities                                                      | <input type="checkbox"/> | <input type="checkbox"/>            | <input type="checkbox"/>            | <input type="checkbox"/> |
| 8. Proximity to primary & secondary schools                                                   | <input type="checkbox"/> | <input type="checkbox"/>            | <input type="checkbox"/>            | <input type="checkbox"/> |
| 9. Proximity to healthcare facilities                                                         | <input type="checkbox"/> | <input type="checkbox"/>            | <input type="checkbox"/>            | <input type="checkbox"/> |
| 10. Sense of safety and security                                                              | <input type="checkbox"/> | <input type="checkbox"/>            | <input type="checkbox"/>            | <input type="checkbox"/> |

| Of the following, what do you think improves में सुधार                                                                                                                                          | thoda                    | lagbhag                             | bahut jyada                         | bikul na                 |
|-------------------------------------------------------------------------------------------------------------------------------------------------------------------------------------------------|--------------------------|-------------------------------------|-------------------------------------|--------------------------|
| Access to community spaces where you can gather with your neighbours and friends/relatives महल्ले में ऐसी जगहों तक पहुँच जहाँ आप अपने पड़ोसियों, रिश्तेदारों और दोस्तों से बात और मुलाकात करें? | very little (+)          | a bit (++)                          | a lot (+++)                         |                          |
| does improving this___ affects                                                                                                                                                                  |                          |                                     |                                     |                          |
| 1. Proximity to public transport like bus stop                                                                                                                                                  | <input type="checkbox"/> | <input type="checkbox"/>            | <input type="checkbox"/>            | <input type="checkbox"/> |
| 2. Proximity to greenery like public parks, gardens                                                                                                                                             | <input type="checkbox"/> | <input type="checkbox"/>            | <input checked="" type="checkbox"/> | <input type="checkbox"/> |
| 3. Access to community spaces where you can gather with your neighbours and friends/relatives                                                                                                   | <input type="checkbox"/> | <input type="checkbox"/>            | <input type="checkbox"/>            | <input type="checkbox"/> |
| 4. Cleanliness of streets                                                                                                                                                                       | <input type="checkbox"/> | <input type="checkbox"/>            | <input checked="" type="checkbox"/> | <input type="checkbox"/> |
| 5. A feeling of belonging to the neighbourhood                                                                                                                                                  | <input type="checkbox"/> | <input type="checkbox"/>            | <input type="checkbox"/>            | <input type="checkbox"/> |
| 6. A good relationship with neighbours and community                                                                                                                                            | <input type="checkbox"/> | <input checked="" type="checkbox"/> | <input type="checkbox"/>            | <input type="checkbox"/> |
| 7. Proximity to employment opportunities                                                                                                                                                        | <input type="checkbox"/> | <input type="checkbox"/>            | <input type="checkbox"/>            | <input type="checkbox"/> |
| 8. Proximity to primary & secondary schools                                                                                                                                                     | <input type="checkbox"/> | <input type="checkbox"/>            | <input type="checkbox"/>            | <input type="checkbox"/> |
| 9. Proximity to healthcare facilities                                                                                                                                                           | <input type="checkbox"/> | <input type="checkbox"/>            | <input type="checkbox"/>            | <input type="checkbox"/> |
| 10. Sense of safety and security                                                                                                                                                                | <input type="checkbox"/> | <input type="checkbox"/>            | <input type="checkbox"/>            | <input type="checkbox"/> |

| Of the following, what do you think improves में सुधार     | thoda           | lagbhag    | bahut jyada | bikul na |
|------------------------------------------------------------|-----------------|------------|-------------|----------|
| Cleanliness of streets/neighbourhood (महल्ले की साफ़-सफाई) | very little (+) | a bit (++) | a lot (+++) |          |
| does improving this___ affects                             |                 |            |             |          |

### Supplementary 9-Ratings from Interviewee 2 Neighbourhood 3

|                                                                                               |                          |                          |                                     |                          |
|-----------------------------------------------------------------------------------------------|--------------------------|--------------------------|-------------------------------------|--------------------------|
| Of the following, what do you think improves में सुधार                                        |                          |                          |                                     |                          |
| Cleanliness of streets/neighbourhood (मुहल्ले को साफ़-सफाई)                                   | thoda                    | lagbhag                  | bahut jyada                         | bikul na                 |
| does improving this____ affects                                                               | very little (+)          | a bit (++)               | a lot (+++)                         |                          |
| 1. Proximity to public transport like bus stop                                                | <input type="checkbox"/> | <input type="checkbox"/> | <input type="checkbox"/>            | <input type="checkbox"/> |
| 2. Proximity to greenery like public parks, gardens                                           | <input type="checkbox"/> | <input type="checkbox"/> | <input type="checkbox"/>            | <input type="checkbox"/> |
| 3. Access to community spaces where you can gather with your neighbours and friends/relatives | <input type="checkbox"/> | <input type="checkbox"/> | <input type="checkbox"/>            | <input type="checkbox"/> |
| 4. Cleanliness of streets                                                                     | <input type="checkbox"/> | <input type="checkbox"/> | <input type="checkbox"/>            | <input type="checkbox"/> |
| 5. A feeling of belonging to the neighbourhood                                                | <input type="checkbox"/> | <input type="checkbox"/> | <input checked="" type="checkbox"/> | <input type="checkbox"/> |
| 6. A good relationship with neighbours and community                                          | <input type="checkbox"/> | <input type="checkbox"/> | <input checked="" type="checkbox"/> | <input type="checkbox"/> |
| 7. Proximity to employment opportunities                                                      | <input type="checkbox"/> | <input type="checkbox"/> | <input type="checkbox"/>            | <input type="checkbox"/> |
| 8. Proximity to primary & secondary schools                                                   | <input type="checkbox"/> | <input type="checkbox"/> | <input type="checkbox"/>            | <input type="checkbox"/> |
| 9. Proximity to healthcare facilities                                                         | <input type="checkbox"/> | <input type="checkbox"/> | <input type="checkbox"/>            | <input type="checkbox"/> |
| 10. Sense of safety and security                                                              |                          |                          |                                     |                          |

|                                                                                               |                          |                                     |                                     |                          |
|-----------------------------------------------------------------------------------------------|--------------------------|-------------------------------------|-------------------------------------|--------------------------|
| Of the following, what do you think improves में सुधार                                        |                          |                                     |                                     |                          |
| Proximity to employment opportunities (रोज़गार/नौकरी के अवसरों से नज़दीकी)                    | thoda                    | lagbhag                             | bahut jyada                         | bikul na                 |
| does improving this____ affects                                                               | very little (+)          | a bit (++)                          | a lot (+++)                         |                          |
| 1. Proximity to public transport like bus stop                                                | <input type="checkbox"/> | <input type="checkbox"/>            | <input checked="" type="checkbox"/> | <input type="checkbox"/> |
| 2. Proximity to greenery like public parks, gardens                                           | <input type="checkbox"/> | <input type="checkbox"/>            | <input type="checkbox"/>            | <input type="checkbox"/> |
| 3. Access to community spaces where you can gather with your neighbours and friends/relatives | <input type="checkbox"/> | <input type="checkbox"/>            | <input type="checkbox"/>            | <input type="checkbox"/> |
| 4. Cleanliness of streets                                                                     | <input type="checkbox"/> | <input type="checkbox"/>            | <input type="checkbox"/>            | <input type="checkbox"/> |
| 5. A feeling of belonging to the neighbourhood                                                | <input type="checkbox"/> | <input type="checkbox"/>            | <input type="checkbox"/>            | <input type="checkbox"/> |
| 6. A good relationship with neighbours and community                                          | <input type="checkbox"/> | <input checked="" type="checkbox"/> | <input type="checkbox"/>            | <input type="checkbox"/> |
| 7. Proximity to employment opportunities                                                      | <input type="checkbox"/> | <input type="checkbox"/>            | <input type="checkbox"/>            | <input type="checkbox"/> |
| 8. Proximity to primary & secondary schools                                                   | <input type="checkbox"/> | <input type="checkbox"/>            | <input type="checkbox"/>            | <input type="checkbox"/> |
| 9. Proximity to healthcare facilities                                                         | <input type="checkbox"/> | <input type="checkbox"/>            | <input type="checkbox"/>            | <input type="checkbox"/> |
| 10. Sense of safety and security                                                              |                          |                                     |                                     |                          |

|                                                                                               |                          |                          |                                     |                          |
|-----------------------------------------------------------------------------------------------|--------------------------|--------------------------|-------------------------------------|--------------------------|
| Of the following, what do you think improves में सुधार                                        |                          |                          |                                     |                          |
| Proximity to healthcare facilities अस्पताल से नज़दीकी और पहुँच                                | thoda                    | lagbhag                  | bahut jyada                         | bikul na                 |
| does improving this____ affects                                                               | very little (+)          | a bit (++)               | a lot (+++)                         |                          |
| 1. Proximity to public transport like bus stop                                                | <input type="checkbox"/> | <input type="checkbox"/> | <input checked="" type="checkbox"/> | <input type="checkbox"/> |
| 2. Proximity to greenery like public parks, gardens                                           | <input type="checkbox"/> | <input type="checkbox"/> | <input type="checkbox"/>            | <input type="checkbox"/> |
| 3. Access to community spaces where you can gather with your neighbours and friends/relatives | <input type="checkbox"/> | <input type="checkbox"/> | <input type="checkbox"/>            | <input type="checkbox"/> |
| 4. Cleanliness of streets                                                                     | <input type="checkbox"/> | <input type="checkbox"/> | <input type="checkbox"/>            | <input type="checkbox"/> |
| 5. A feeling of belonging to the neighbourhood                                                | <input type="checkbox"/> | <input type="checkbox"/> | <input type="checkbox"/>            | <input type="checkbox"/> |
| 6. A good relationship with neighbours and community                                          | <input type="checkbox"/> | <input type="checkbox"/> | <input checked="" type="checkbox"/> | <input type="checkbox"/> |
| 7. Proximity to employment opportunities                                                      | <input type="checkbox"/> | <input type="checkbox"/> | <input type="checkbox"/>            | <input type="checkbox"/> |
| 8. Proximity to primary & secondary schools                                                   | <input type="checkbox"/> | <input type="checkbox"/> | <input type="checkbox"/>            | <input type="checkbox"/> |
| 9. Proximity to healthcare facilities                                                         | <input type="checkbox"/> | <input type="checkbox"/> | <input type="checkbox"/>            | <input type="checkbox"/> |
| 10. Sense of safety and security                                                              |                          |                          |                                     |                          |

### Supplementary 10-Ratings from Interviewee 3 Neighbourhood 3

|                                                                                                                                                                                                              | not at all                          | a bit                               | a lot                               |
|--------------------------------------------------------------------------------------------------------------------------------------------------------------------------------------------------------------|-------------------------------------|-------------------------------------|-------------------------------------|
| 1 How much do you like your neighbourhood?<br>आप अपने गली-महल्ले को कितना पसंद करते हैं?                                                                                                                     | <input type="checkbox"/>            | <input checked="" type="checkbox"/> | <input type="checkbox"/>            |
| 2 How would you rate the following in your neighbourhood?<br>आप अपने गली-महल्ले में इन चीजों को कैसे रेट करेंगे? संतुष्ट                                                                                     | बिल्कुल नहीं,<br>bad                | , थोड़ा सा<br>okay                  | बहुत ज्यादा<br>good                 |
| Access to basic amenities like household level tap water, electricity, toilet/sewerage<br>घर में नलके का पानी, बिजली, लेट्रिन/ गंदे पानी की नाली ,                                                           | <input type="checkbox"/>            | <input type="checkbox"/>            | <input checked="" type="checkbox"/> |
| Quality of housing structure घर की बनावट की हालत                                                                                                                                                             | <input type="checkbox"/>            | <input type="checkbox"/>            | <input checked="" type="checkbox"/> |
| Proximity to public transport like bus stop, बस स्टॉप से नज़दीकी                                                                                                                                             | <input checked="" type="checkbox"/> | <input type="checkbox"/>            | <input type="checkbox"/>            |
| Proximity to greenery like public parks, gardens पार्क, बगीचे से नज़दीकी                                                                                                                                     | <input type="checkbox"/>            | <input type="checkbox"/>            | <input type="checkbox"/>            |
| Access to community spaces where you can gather with your neighbours and friends/relatives<br>महल्ले में ऐसी सामुदायिक जगहों तक पहुँच जहाँ आप अपने पड़ोसियों, रिश्तेदारों और दोस्तों से बात और मुलाकात करें? | <input type="checkbox"/>            | <input type="checkbox"/>            | <input type="checkbox"/>            |
| Cleanliness of streets/neighbourhood (महल्ले की साफ़-सफाई)                                                                                                                                                   | <input type="checkbox"/>            | <input type="checkbox"/>            | <input checked="" type="checkbox"/> |
| A feeling of belonging to the neighbourhood (महल्ले अपनेपन की भावना)                                                                                                                                         | <input type="checkbox"/>            | <input checked="" type="checkbox"/> | <input type="checkbox"/>            |
| A good relationship with neighbours and community (पड़ोसियों और समाज के लोगों से अच्छे सम्बन्ध )                                                                                                             | <input type="checkbox"/>            | <input checked="" type="checkbox"/> | <input type="checkbox"/>            |
| Proximity to employment opportunities (रोज़गार/नौकरी के अवसरों से नज़दीकी)                                                                                                                                   | <input type="checkbox"/>            | <input type="checkbox"/>            | <input checked="" type="checkbox"/> |
| Proximity to primary & secondary schools प्राथमिक और माध्यमिक स्कूलों से नज़दीकी और पहुँच                                                                                                                    | <input type="checkbox"/>            | <input type="checkbox"/>            | <input checked="" type="checkbox"/> |
| Proximity to healthcare facilities अस्पताल से नज़दीकी और पहुँच                                                                                                                                               | <input type="checkbox"/>            | <input type="checkbox"/>            | <input checked="" type="checkbox"/> |
| Sense of safety and security सुरक्षा और सलामती की भावना                                                                                                                                                      | <input type="checkbox"/>            | <input type="checkbox"/>            | <input checked="" type="checkbox"/> |
| Security of tenure घर/मकान में रहने की सुरक्षा( निकाले जाने के डर से)                                                                                                                                        | <input type="checkbox"/>            | <input type="checkbox"/>            | <input checked="" type="checkbox"/> |
| Safety from natural and manmade hazards प्राकृतिक आपदा flood                                                                                                                                                 | <input type="checkbox"/>            | <input type="checkbox"/>            | <input checked="" type="checkbox"/> |

| Of the following, what do you think improves में सुधार                                        | thoda                               | lagbhag                  | bahut jyada              | bikul na                 |
|-----------------------------------------------------------------------------------------------|-------------------------------------|--------------------------|--------------------------|--------------------------|
| Proximity to public transport like bus stop, बस स्टॉप से नज़दीकी                              | very little (+)                     | a bit (++)               | a lot (+++)              |                          |
| does improving this___ affects                                                                |                                     |                          |                          |                          |
| 1. Proximity to public transport like bus stop                                                | <input type="checkbox"/>            | <input type="checkbox"/> | <input type="checkbox"/> | <input type="checkbox"/> |
| 2. Proximity to greenery like public parks, gardens                                           | <input type="checkbox"/>            | <input type="checkbox"/> | <input type="checkbox"/> | <input type="checkbox"/> |
| 3. Access to community spaces where you can gather with your neighbours and friends/relatives | <input type="checkbox"/>            | <input type="checkbox"/> | <input type="checkbox"/> | <input type="checkbox"/> |
| 4. Cleanliness of streets                                                                     | <input type="checkbox"/>            | <input type="checkbox"/> | <input type="checkbox"/> | <input type="checkbox"/> |
| 5. A feeling of belonging to the neighbourhood                                                | <input checked="" type="checkbox"/> | <input type="checkbox"/> | <input type="checkbox"/> | <input type="checkbox"/> |
| 6. A good relationship with neighbours and community                                          | <input type="checkbox"/>            | <input type="checkbox"/> | <input type="checkbox"/> | <input type="checkbox"/> |
| 7. Proximity to employment opportunities                                                      | <input type="checkbox"/>            | <input type="checkbox"/> | <input type="checkbox"/> | <input type="checkbox"/> |
| 8. Proximity to primary & secondary schools                                                   | <input type="checkbox"/>            | <input type="checkbox"/> | <input type="checkbox"/> | <input type="checkbox"/> |
| 9. Proximity to healthcare facilities                                                         | <input type="checkbox"/>            | <input type="checkbox"/> | <input type="checkbox"/> | <input type="checkbox"/> |
| 10. Sense of safety and security                                                              | <input type="checkbox"/>            | <input type="checkbox"/> | <input type="checkbox"/> | <input type="checkbox"/> |

| Of the following, what do you think improves में सुधार                                        | thoda                    | lagbhag                             | bahut jyada                         | bikul na                 |
|-----------------------------------------------------------------------------------------------|--------------------------|-------------------------------------|-------------------------------------|--------------------------|
| A feeling of belonging to the neighbourhood (महल्ले अपनेपन की भावना)                          | very little (+)          | a bit (++)                          | a lot (+++)                         |                          |
| does improving this___ affects                                                                |                          |                                     |                                     |                          |
| 1. Proximity to public transport like bus stop                                                | <input type="checkbox"/> | <input type="checkbox"/>            | <input checked="" type="checkbox"/> | <input type="checkbox"/> |
| 2. Proximity to greenery like public parks, gardens                                           | <input type="checkbox"/> | <input checked="" type="checkbox"/> | <input type="checkbox"/>            | <input type="checkbox"/> |
| 3. Access to community spaces where you can gather with your neighbours and friends/relatives | <input type="checkbox"/> | <input type="checkbox"/>            | <input checked="" type="checkbox"/> | <input type="checkbox"/> |
| 4. Cleanliness of streets                                                                     | <input type="checkbox"/> | <input type="checkbox"/>            | <input checked="" type="checkbox"/> | <input type="checkbox"/> |
| 5. A feeling of belonging to the neighbourhood                                                | <input type="checkbox"/> | <input type="checkbox"/>            | <input type="checkbox"/>            | <input type="checkbox"/> |
| 6. A good relationship with neighbours and community                                          | <input type="checkbox"/> | <input type="checkbox"/>            | <input checked="" type="checkbox"/> | <input type="checkbox"/> |
| 7. Proximity to employment opportunities                                                      | <input type="checkbox"/> | <input type="checkbox"/>            | <input type="checkbox"/>            | <input type="checkbox"/> |
| 8. Proximity to primary & secondary schools                                                   | <input type="checkbox"/> | <input checked="" type="checkbox"/> | <input type="checkbox"/>            | <input type="checkbox"/> |
| 9. Proximity to healthcare facilities                                                         | <input type="checkbox"/> | <input checked="" type="checkbox"/> | <input type="checkbox"/>            | <input type="checkbox"/> |
| 10. Sense of safety and security                                                              | <input type="checkbox"/> | <input type="checkbox"/>            | <input checked="" type="checkbox"/> | <input type="checkbox"/> |



## Supplementary 11-Ratings from Interviewee 1 Neighbourhood 4

|                                                                                                                                                                                                              | not at all               | a bit                               | a lot                               |
|--------------------------------------------------------------------------------------------------------------------------------------------------------------------------------------------------------------|--------------------------|-------------------------------------|-------------------------------------|
| 1 How much do you like your neighbourhood?<br>आप अपने गली-महल्ले को कितना पसंद करते हैं?                                                                                                                     | <input type="checkbox"/> | <input type="checkbox"/>            | <input checked="" type="checkbox"/> |
| 2 How would you rate the following in your neighbourhood?<br>आप अपने गली-महल्ले में इन चीजों को कैसे रेट करेंगे? संतुष्ट                                                                                     | बिल्कुल नहीं,<br>bad     | , थोड़ा सा<br>okay                  | बहुत ज्यादा<br>good                 |
| Access to basic amenities like household level tap water, electricity, toilet/sewerage<br>घर में नलके का पानी, बिजली, लैटिन/ गंदे पानी की नाली ,                                                             | <input type="checkbox"/> | <input type="checkbox"/>            | <input checked="" type="checkbox"/> |
| Quality of housing structure घर की बनावट की हालत                                                                                                                                                             | <input type="checkbox"/> | <input type="checkbox"/>            | <input checked="" type="checkbox"/> |
| Proximity to public transport like bus stop, बस स्टॉप से नज़दीकी                                                                                                                                             | <input type="checkbox"/> | <input checked="" type="checkbox"/> | <input type="checkbox"/>            |
| Proximity to greenery like public parks, gardens पार्क, बगीचे से नज़दीकी                                                                                                                                     | <input type="checkbox"/> | <input checked="" type="checkbox"/> | <input type="checkbox"/>            |
| Access to community spaces where you can gather with your neighbours and friends/relatives<br>महल्ले में ऐसी सामुदायिक जगहों तक पहुँच जहाँ आप अपने पड़ोसियों, रिश्तेदारों और दोस्तों से बात और मुलाकात करें? | <input type="checkbox"/> | <input type="checkbox"/>            | <input checked="" type="checkbox"/> |
| Cleanliness of streets/neighbourhood (महल्ले की साफ़-सफाई)                                                                                                                                                   | <input type="checkbox"/> | <input type="checkbox"/>            | <input checked="" type="checkbox"/> |
| A feeling of belonging to the neighbourhood (महल्ले अपनेपन की भावना)                                                                                                                                         | <input type="checkbox"/> | <input checked="" type="checkbox"/> | <input type="checkbox"/>            |
| A good relationship with neighbours and community (पड़ोसियों और समाज के लोगों से अच्छे सम्बन्ध)                                                                                                              | <input type="checkbox"/> | <input checked="" type="checkbox"/> | <input type="checkbox"/>            |
| Proximity to employment opportunities (रोज़गार/नौकरी के अवसरों से नज़दीकी)                                                                                                                                   | <input type="checkbox"/> | <input type="checkbox"/>            | <input checked="" type="checkbox"/> |
| Proximity to primary & secondary schools प्राथमिक और माध्यमिक स्कूलों से नज़दीकी और पहुँच                                                                                                                    | <input type="checkbox"/> | <input type="checkbox"/>            | <input checked="" type="checkbox"/> |
| Proximity to healthcare facilities अस्पताल से नज़दीकी और पहुँच                                                                                                                                               | <input type="checkbox"/> | <input type="checkbox"/>            | <input checked="" type="checkbox"/> |
| Sense of safety and security सुरक्षा और सलामती की भावना                                                                                                                                                      | <input type="checkbox"/> | <input type="checkbox"/>            | <input checked="" type="checkbox"/> |
| Security of tenure घर/मकान में रहने की सुरक्षा( निकाले जाने के डर से)                                                                                                                                        | <input type="checkbox"/> | <input type="checkbox"/>            | <input checked="" type="checkbox"/> |
| Safety from natural and manmade hazards प्राकृतिक आपदा flood                                                                                                                                                 | <input type="checkbox"/> | <input type="checkbox"/>            | <input checked="" type="checkbox"/> |

| Of the following, what do you think improves में सुधार                                             |                          |                          |                            |                          |
|----------------------------------------------------------------------------------------------------|--------------------------|--------------------------|----------------------------|--------------------------|
| Proximity to public transport like bus stop, बस स्टॉप से नज़दीकी<br>does improving this___ affects | thoda<br>very little (+) | lagbhag<br>a bit (++)    | bahut jyada<br>a lot (+++) | bikul na                 |
| 1. Proximity to public transport like bus stop                                                     | <input type="checkbox"/> | <input type="checkbox"/> | <input type="checkbox"/>   | <input type="checkbox"/> |
| 2. Proximity to greenery like public parks, gardens                                                | <input type="checkbox"/> | <input type="checkbox"/> | <input type="checkbox"/>   | <input type="checkbox"/> |
| 3. Access to community spaces where you can gather with your neighbours and friends/relatives      | <input type="checkbox"/> | <input type="checkbox"/> | <input type="checkbox"/>   | <input type="checkbox"/> |
| 4. Cleanliness of streets                                                                          | <input type="checkbox"/> | <input type="checkbox"/> | <input type="checkbox"/>   | <input type="checkbox"/> |
| 5. A feeling of belonging to the neighbourhood                                                     | <input type="checkbox"/> | <input type="checkbox"/> | <input type="checkbox"/>   | <input type="checkbox"/> |
| 6. A good relationship with neighbours and community                                               | <input type="checkbox"/> | <input type="checkbox"/> | <input type="checkbox"/>   | <input type="checkbox"/> |
| 7. Proximity to employment opportunities                                                           | <input type="checkbox"/> | <input type="checkbox"/> | <input type="checkbox"/>   | <input type="checkbox"/> |
| 8. Proximity to primary & secondary schools                                                        | <input type="checkbox"/> | <input type="checkbox"/> | <input type="checkbox"/>   | <input type="checkbox"/> |
| 9. Proximity to healthcare facilities                                                              | <input type="checkbox"/> | <input type="checkbox"/> | <input type="checkbox"/>   | <input type="checkbox"/> |
| 10. Sense of safety and security                                                                   | <input type="checkbox"/> | <input type="checkbox"/> | <input type="checkbox"/>   | <input type="checkbox"/> |

| Of the following, what do you think improves में सुधार                                                     |                          |                          |                                     |                          |
|------------------------------------------------------------------------------------------------------------|--------------------------|--------------------------|-------------------------------------|--------------------------|
| Proximity to greenery like public parks, gardens पार्क, बगीचे से नज़दीकी<br>does improving this___ affects | thoda<br>very little (+) | lagbhag<br>a bit (++)    | bahut jyada<br>a lot (+++)          | bikul na                 |
| 1. Proximity to public transport like bus stop                                                             | <input type="checkbox"/> | <input type="checkbox"/> | <input type="checkbox"/>            | <input type="checkbox"/> |
| 2. Proximity to greenery like public parks, gardens                                                        | <input type="checkbox"/> | <input type="checkbox"/> | <input type="checkbox"/>            | <input type="checkbox"/> |
| 3. Access to community spaces where you can gather with your neighbours and friends/relatives              | <input type="checkbox"/> | <input type="checkbox"/> | <input type="checkbox"/>            | <input type="checkbox"/> |
| 4. Cleanliness of streets                                                                                  | <input type="checkbox"/> | <input type="checkbox"/> | <input type="checkbox"/>            | <input type="checkbox"/> |
| 5. A feeling of belonging to the neighbourhood                                                             | <input type="checkbox"/> | <input type="checkbox"/> | <input checked="" type="checkbox"/> | <input type="checkbox"/> |
| 6. A good relationship with neighbours and community                                                       | <input type="checkbox"/> | <input type="checkbox"/> | <input checked="" type="checkbox"/> | <input type="checkbox"/> |
| 7. Proximity to employment opportunities                                                                   | <input type="checkbox"/> | <input type="checkbox"/> | <input type="checkbox"/>            | <input type="checkbox"/> |
| 8. Proximity to primary & secondary schools                                                                | <input type="checkbox"/> | <input type="checkbox"/> | <input type="checkbox"/>            | <input type="checkbox"/> |
| 9. Proximity to healthcare facilities                                                                      | <input type="checkbox"/> | <input type="checkbox"/> | <input type="checkbox"/>            | <input type="checkbox"/> |
| 10. Sense of safety and security                                                                           | <input type="checkbox"/> | <input type="checkbox"/> | <input type="checkbox"/>            | <input type="checkbox"/> |

| Of the following, what do you think improves में सुधार                                                 |                          |                          |                                     |                          |
|--------------------------------------------------------------------------------------------------------|--------------------------|--------------------------|-------------------------------------|--------------------------|
| A feeling of belonging to the neighbourhood (महल्ले अपनेपन की भावना)<br>does improving this___ affects | thoda<br>very little (+) | lagbhag<br>a bit (++)    | bahut jyada<br>a lot (+++)          | bikul na                 |
| 1. Proximity to public transport like bus stop                                                         | <input type="checkbox"/> | <input type="checkbox"/> | <input type="checkbox"/>            | <input type="checkbox"/> |
| 2. Proximity to greenery like public parks, gardens                                                    | <input type="checkbox"/> | <input type="checkbox"/> | <input type="checkbox"/>            | <input type="checkbox"/> |
| 3. Access to community spaces where you can gather with your neighbours and friends/relatives          | <input type="checkbox"/> | <input type="checkbox"/> | <input type="checkbox"/>            | <input type="checkbox"/> |
| 4. Cleanliness of streets                                                                              | <input type="checkbox"/> | <input type="checkbox"/> | <input type="checkbox"/>            | <input type="checkbox"/> |
| 5. A feeling of belonging to the neighbourhood                                                         | <input type="checkbox"/> | <input type="checkbox"/> | <input type="checkbox"/>            | <input type="checkbox"/> |
| 6. A good relationship with neighbours and community                                                   | <input type="checkbox"/> | <input type="checkbox"/> | <input checked="" type="checkbox"/> | <input type="checkbox"/> |
| 7. Proximity to employment opportunities                                                               | <input type="checkbox"/> | <input type="checkbox"/> | <input type="checkbox"/>            | <input type="checkbox"/> |
| 8. Proximity to primary & secondary schools                                                            | <input type="checkbox"/> | <input type="checkbox"/> | <input type="checkbox"/>            | <input type="checkbox"/> |
| 9. Proximity to healthcare facilities                                                                  | <input type="checkbox"/> | <input type="checkbox"/> | <input type="checkbox"/>            | <input type="checkbox"/> |
| 10. Sense of safety and security                                                                       | <input type="checkbox"/> | <input type="checkbox"/> | <input type="checkbox"/>            | <input type="checkbox"/> |



## Supplementary 12-Ratings from Interviewee 2 Neighbourhood 4

|                                                                                                                                                                                                              | not at all                          | a bit                               | a lot                               |
|--------------------------------------------------------------------------------------------------------------------------------------------------------------------------------------------------------------|-------------------------------------|-------------------------------------|-------------------------------------|
| 1 How much do you like your neighbourhood?<br>आप अपने गली-महल्ले को कितना पसंद करते हैं?                                                                                                                     | <input type="checkbox"/>            | <input type="checkbox"/>            | <input checked="" type="checkbox"/> |
| 2 How would you rate the following in your neighbourhood?<br>आप अपने गली-महल्ले में इन चीजों को कैसे रेट करेंगे? संतुष्ट                                                                                     | बिल्कुल नहीं,<br>bad                | , थोड़ा सा<br>okay                  | बहुत ज्यादा<br>good                 |
| Access to basic amenities like household level tap water, electricity, toilet/sewerage<br>घर में नलके का पानी, बिजली, लेट्रिन/गंदे पानी की नाली,                                                             | <input type="checkbox"/>            | <input type="checkbox"/>            | <input checked="" type="checkbox"/> |
| Quality of housing structure घर की बनावट की हालत                                                                                                                                                             | <input type="checkbox"/>            | <input type="checkbox"/>            | <input checked="" type="checkbox"/> |
| Proximity to public transport like bus stop, बस स्टॉप से नज़दीकी                                                                                                                                             | <input type="checkbox"/>            | <input type="checkbox"/>            | <input checked="" type="checkbox"/> |
| Proximity to greenery like public parks, gardens पार्क, बगीचे से नज़दीकी                                                                                                                                     | <input checked="" type="checkbox"/> | <input type="checkbox"/>            | <input type="checkbox"/>            |
| Access to community spaces where you can gather with your neighbours and friends/relatives<br>महल्ले में ऐसी सामुदायिक जगहों तक पहुँच जहाँ आप अपने पड़ोसियों, रिश्तेदारों और दोस्तों से बात और मुलाकात करें? | <input type="checkbox"/>            | <input type="checkbox"/>            | <input checked="" type="checkbox"/> |
| Cleanliness of streets/neighbourhood (महल्ले की सफ़ाई-सफाई)                                                                                                                                                  | <input type="checkbox"/>            | <input type="checkbox"/>            | <input checked="" type="checkbox"/> |
| A feeling of belonging to the neighbourhood (महल्ले अपनेपन की भावना)                                                                                                                                         | <input type="checkbox"/>            | <input checked="" type="checkbox"/> | <input type="checkbox"/>            |
| A good relationship with neighbours and community (पड़ोसियों और समाज के लोगों से अच्छे सम्बन्ध)                                                                                                              | <input type="checkbox"/>            | <input checked="" type="checkbox"/> | <input type="checkbox"/>            |
| Proximity to employment opportunities (रोज़गार/नौकरी के अवसरों से नज़दीकी)                                                                                                                                   | <input type="checkbox"/>            | <input type="checkbox"/>            | <input checked="" type="checkbox"/> |
| Proximity to primary & secondary schools प्राथमिक और माध्यमिक स्कूलों से नज़दीकी और पहुँच                                                                                                                    | <input type="checkbox"/>            | <input type="checkbox"/>            | <input checked="" type="checkbox"/> |
| Proximity to healthcare facilities अस्पताल से नज़दीकी और पहुँच                                                                                                                                               | <input type="checkbox"/>            | <input type="checkbox"/>            | <input checked="" type="checkbox"/> |
| Sense of safety and security सुरक्षा और सलामती की भावना                                                                                                                                                      | <input type="checkbox"/>            | <input type="checkbox"/>            | <input checked="" type="checkbox"/> |
| Security of tenure घर/मकान में रहने की सुरक्षा( निकाले जाने के डर से)                                                                                                                                        | <input type="checkbox"/>            | <input type="checkbox"/>            | <input checked="" type="checkbox"/> |
| Safety from natural and manmade hazards प्राकृतिक आपदा flood                                                                                                                                                 | <input type="checkbox"/>            | <input type="checkbox"/>            | <input checked="" type="checkbox"/> |

| Of the following, what do you think improves में सुधार                                        | thoda                    | lagbhag                             | bahut jyada                         | bikul na                 |
|-----------------------------------------------------------------------------------------------|--------------------------|-------------------------------------|-------------------------------------|--------------------------|
| Proximity to greenery like public parks, gardens पार्क, बगीचे से नज़दीकी                      | very little (+)          | a bit (++)                          | a lot (+++)                         |                          |
| does improving this___ affects                                                                |                          |                                     |                                     |                          |
| 1. Proximity to public transport like bus stop                                                | <input type="checkbox"/> | <input type="checkbox"/>            | <input type="checkbox"/>            | <input type="checkbox"/> |
| 2. Proximity to greenery like public parks, gardens                                           | <input type="checkbox"/> | <input type="checkbox"/>            | <input type="checkbox"/>            | <input type="checkbox"/> |
| 3. Access to community spaces where you can gather with your neighbours and friends/relatives | <input type="checkbox"/> | <input checked="" type="checkbox"/> | <input type="checkbox"/>            | <input type="checkbox"/> |
| 4. Cleanliness of streets                                                                     | <input type="checkbox"/> | <input type="checkbox"/>            | <input type="checkbox"/>            | <input type="checkbox"/> |
| 5. A feeling of belonging to the neighbourhood                                                | <input type="checkbox"/> | <input type="checkbox"/>            | <input checked="" type="checkbox"/> | <input type="checkbox"/> |
| 6. A good relationship with neighbours and community                                          | <input type="checkbox"/> | <input type="checkbox"/>            | <input checked="" type="checkbox"/> | <input type="checkbox"/> |
| 7. Proximity to employment opportunities                                                      | <input type="checkbox"/> | <input type="checkbox"/>            | <input type="checkbox"/>            | <input type="checkbox"/> |
| 8. Proximity to primary & secondary schools                                                   | <input type="checkbox"/> | <input type="checkbox"/>            | <input type="checkbox"/>            | <input type="checkbox"/> |
| 9. Proximity to healthcare facilities                                                         | <input type="checkbox"/> | <input type="checkbox"/>            | <input type="checkbox"/>            | <input type="checkbox"/> |
| 10. Sense of safety and security                                                              | <input type="checkbox"/> | <input type="checkbox"/>            | <input type="checkbox"/>            | <input type="checkbox"/> |

| Of the following, what do you think improves में सुधार                                        | thoda                    | lagbhag                  | bahut jyada                         | bikul na                 |
|-----------------------------------------------------------------------------------------------|--------------------------|--------------------------|-------------------------------------|--------------------------|
| A feeling of belonging to the neighbourhood (महल्ले अपनेपन की भावना)                          | very little (+)          | a bit (++)               | a lot (+++)                         |                          |
| does improving this___ affects                                                                |                          |                          |                                     |                          |
| 1. Proximity to public transport like bus stop                                                | <input type="checkbox"/> | <input type="checkbox"/> | <input type="checkbox"/>            | <input type="checkbox"/> |
| 2. Proximity to greenery like public parks, gardens                                           | <input type="checkbox"/> | <input type="checkbox"/> | <input type="checkbox"/>            | <input type="checkbox"/> |
| 3. Access to community spaces where you can gather with your neighbours and friends/relatives | <input type="checkbox"/> | <input type="checkbox"/> | <input checked="" type="checkbox"/> | <input type="checkbox"/> |
| 4. Cleanliness of streets                                                                     | <input type="checkbox"/> | <input type="checkbox"/> | <input type="checkbox"/>            | <input type="checkbox"/> |
| 5. A feeling of belonging to the neighbourhood                                                | <input type="checkbox"/> | <input type="checkbox"/> | <input checked="" type="checkbox"/> | <input type="checkbox"/> |
| 6. A good relationship with neighbours and community                                          | <input type="checkbox"/> | <input type="checkbox"/> | <input checked="" type="checkbox"/> | <input type="checkbox"/> |
| 7. Proximity to employment opportunities                                                      | <input type="checkbox"/> | <input type="checkbox"/> | <input type="checkbox"/>            | <input type="checkbox"/> |
| 8. Proximity to primary & secondary schools                                                   | <input type="checkbox"/> | <input type="checkbox"/> | <input type="checkbox"/>            | <input type="checkbox"/> |
| 9. Proximity to healthcare facilities                                                         | <input type="checkbox"/> | <input type="checkbox"/> | <input type="checkbox"/>            | <input type="checkbox"/> |
| 10. Sense of safety and security                                                              | <input type="checkbox"/> | <input type="checkbox"/> | <input type="checkbox"/>            | <input type="checkbox"/> |

| Of the following, what do you think improves में सुधार                                          | thoda                    | lagbhag                             | bahut jyada                         | bikul na                 |
|-------------------------------------------------------------------------------------------------|--------------------------|-------------------------------------|-------------------------------------|--------------------------|
| A good relationship with neighbours and community (पड़ोसियों और समाज के लोगों से अच्छे सम्बन्ध) | very little (+)          | a bit (++)                          | a lot (+++)                         |                          |
| does improving this___ affects                                                                  |                          |                                     |                                     |                          |
| 1. Proximity to public transport like bus stop                                                  | <input type="checkbox"/> | <input type="checkbox"/>            | <input type="checkbox"/>            | <input type="checkbox"/> |
| 2. Proximity to greenery like public parks, gardens                                             | <input type="checkbox"/> | <input type="checkbox"/>            | <input type="checkbox"/>            | <input type="checkbox"/> |
| 3. Access to community spaces where you can gather with your neighbours and friends/relatives   | <input type="checkbox"/> | <input type="checkbox"/>            | <input checked="" type="checkbox"/> | <input type="checkbox"/> |
| 4. Cleanliness of streets                                                                       | <input type="checkbox"/> | <input type="checkbox"/>            | <input type="checkbox"/>            | <input type="checkbox"/> |
| 5. A feeling of belonging to the neighbourhood                                                  | <input type="checkbox"/> | <input checked="" type="checkbox"/> | <input type="checkbox"/>            | <input type="checkbox"/> |
| 6. A good relationship with neighbours and community                                            | <input type="checkbox"/> | <input type="checkbox"/>            | <input type="checkbox"/>            | <input type="checkbox"/> |
| 7. Proximity to employment opportunities                                                        | <input type="checkbox"/> | <input type="checkbox"/>            | <input type="checkbox"/>            | <input type="checkbox"/> |
| 8. Proximity to primary & secondary schools                                                     | <input type="checkbox"/> | <input type="checkbox"/>            | <input type="checkbox"/>            | <input type="checkbox"/> |
| 9. Proximity to healthcare facilities                                                           | <input type="checkbox"/> | <input type="checkbox"/>            | <input type="checkbox"/>            | <input type="checkbox"/> |
| 10. Sense of safety and security                                                                | <input type="checkbox"/> | <input type="checkbox"/>            | <input type="checkbox"/>            | <input type="checkbox"/> |
