# Supplementary material
Source: MDPI journal article supplement (https://www.mdpi.com/2413-8851/5/2/44)
Supplement: s1 [file s1]

Archive with 1 entries (1 files):
- urbansci-1171563-supplementary.pdf
